# Supplementary material
Source: PubMed Central journal article supplement (PMC3711397)
Supplement: NIHMS392973-supplement-supplement_1.pdf [file NIHMS392973-supplement-supplement_1.pdf]

**Online-only Table 1: Single SNP associations with ischemic stroke under a dominant model**

| SNP        | MA <sup>a</sup> | Familial Caucasian series (264 patients, 374 controls) |                   |         | ISGS Caucasian series (449 patients, 334 controls) |                   |         | Combined Caucasian series (713 patients, 708 controls) |                    |         | ISGS African American series (166 patients, 117 controls) |                   |         |
|------------|-----------------|--------------------------------------------------------|-------------------|---------|----------------------------------------------------|-------------------|---------|--------------------------------------------------------|--------------------|---------|-----------------------------------------------------------|-------------------|---------|
|            |                 | MAF                                                    | OR (95% CI)       | P-value | MAF                                                | OR (95% CI)       | P-value | MAF                                                    | OR (95% CI)        | P-value | MAF                                                       | OR (95% CI)       | P-value |
| rs646776   | C               | 19.8%                                                  | 1.00 (0.72, 1.39) | 0.99    | 23.2%                                              | 1.17 (0.85, 1.61) | 0.34    | 21.7%                                                  | 1.07 (0.86 - 1.33) | 0.56    | 36.2%                                                     | 0.65 (0.38, 1.13) | 0.13    |
| rs11206510 | C               | 18.8%                                                  | 1.05 (0.75, 1.47) | 0.76    | 19.3%                                              | 0.94 (0.68, 1.31) | 0.72    | 19.1%                                                  | 1.03 (0.82 - 1.29) | 0.80    | 12.2%                                                     | 0.89 (0.48, 1.67) | 0.71    |
| rs6725887  | C               | 12.8%                                                  | 0.76 (0.52, 1.11) | 0.15    | 11.8%                                              | 0.93 (0.64, 1.35) | 0.68    | 12.2%                                                  | 0.84 (0.66 - 1.08) | 0.18    | 2.5%                                                      | 1.23 (0.34, 4.42) | 0.75    |
| rs9818870  | T               | 16.3%                                                  | 0.82 (0.58, 1.16) | 0.26    | 16.2%                                              | 0.81 (0.57, 1.13) | 0.21    | 16.2%                                                  | 0.80 (0.64 - 1.01) | 0.065   | 10.1%                                                     | 1.08 (0.55, 2.14) | 0.82    |
| rs12526453 | G               | 35.2%                                                  | 1.11 (0.80, 1.54) | 0.52    | 33.0%                                              | 1.08 (0.79, 1.47) | 0.64    | 34.0%                                                  | 1.04 (0.84 - 1.29) | 0.70    | 15.9%                                                     | 1.23 (0.69, 2.20) | 0.48    |
| rs6922269  | A               | 28.8%                                                  | 0.72 (0.52, 0.99) | 0.042   | 29.1%                                              | 1.28 (0.94, 1.75) | 0.12    | 29.0%                                                  | 0.98 (0.79 - 1.21) | 0.83    | 53.4%                                                     | 1.09 (0.57, 2.08) | 0.79    |
| rs2048327  | C               | 34.8%                                                  | 0.90 (0.66, 1.24) | 0.53    | 35.2%                                              | 1.44 (1.05, 1.98) | 0.024   | 35.0%                                                  | 1.13 (0.91 - 1.40) | 0.26    | 8.0%                                                      | 0.91 (0.43, 1.92) | 0.80    |
| rs3127599  | T               | 26.7%                                                  | 1.02 (0.74, 1.40) | 0.90    | 31.7%                                              | 1.24 (0.90, 1.69) | 0.18    | 29.5%                                                  | 1.10 (0.89 - 1.36) | 0.40    | 28.3%                                                     | 1.20 (0.70, 2.07) | 0.50    |
| rs7767084  | C               | 17.0%                                                  | 0.92 (0.65, 1.29) | 0.63    | 15.5%                                              | 0.98 (0.70, 1.38) | 0.91    | 16.2%                                                  | 0.95 (0.76 - 1.20) | 0.68    | 2.7%                                                      | 0.68 (0.22, 2.12) | 0.51    |
| rs10755578 | G               | 45.8%                                                  | 0.90 (0.64, 1.28) | 0.56    | 47.1%                                              | 1.50 (1.06, 2.13) | 0.024   | 46.5%                                                  | 1.09 (0.86 - 1.38) | 0.48    | 33.0%                                                     | 0.96 (0.55, 1.66) | 0.87    |
| rs1333040  | C               | 41.0%                                                  | 0.98 (0.71, 1.37) | 0.92    | 38.0%                                              | 1.46 (1.06, 2.01) | 0.021   | 39.3%                                                  | 1.20 (0.96 - 1.50) | 0.10    | 38.5%                                                     | 0.53 (0.30, 0.93) | 0.026   |
| rs4977574  | G               | 47.2%                                                  | 1.02 (0.72, 1.44) | 0.91    | 51.3%                                              | 0.79 (0.55, 1.14) | 0.21    | 49.4%                                                  | 0.93 (0.73 - 1.18) | 0.55    | 20.5%                                                     | 0.95 (0.54, 1.67) | 0.86    |
| rs1333042  | A               | 50.8%                                                  | 1.29 (0.89, 1.86) | 0.17    | 46.9%                                              | 1.04 (0.74, 1.47) | 0.83    | 48.7%                                                  | 1.14 (0.90 - 1.45) | 0.28    | 8.5%                                                      | 0.61 (0.30, 1.24) | 0.17    |
| rs2383207  | A               | 49.9%                                                  | 1.22 (0.85, 1.76) | 0.27    | 45.9%                                              | 1.07 (0.76, 1.51) | 0.68    | 47.7%                                                  | 1.13 (0.89 - 1.43) | 0.32    | 8.5%                                                      | 0.61 (0.30, 1.24) | 0.17    |
| rs1746048  | T               | 14.4%                                                  | 0.86 (0.60, 1.23) | 0.40    | 12.4%                                              | 1.05 (0.73, 1.52) | 0.80    | 13.3%                                                  | 0.96 (0.75 - 1.22) | 0.72    | 45.8%                                                     | 1.44 (0.80, 2.58) | 0.22    |
| rs2259816  | T               | 34.2%                                                  | 0.80 (0.58, 1.10) | 0.17    | 35.4%                                              | 1.25 (0.91, 1.71) | 0.17    | 34.9%                                                  | 1.01 (0.82 - 1.25) | 0.92    | 13.1%                                                     | 0.80 (0.43, 1.49) | 0.48    |
| rs1048990  | G               | 16.9%                                                  | 0.74 (0.52, 1.05) | 0.087   | 15.6%                                              | 0.83 (0.59, 1.16) | 0.27    | 16.2%                                                  | 0.82 (0.65 - 1.03) | 0.087   | 3.5%                                                      | 0.33 (0.11, 0.96) | 0.042   |
| rs17228212 | C               | 30.0%                                                  | 1.32 (0.96, 1.81) | 0.091   | 29.0%                                              | 0.77 (0.57, 1.06) | 0.11    | 29.4%                                                  | 1.03 (0.84 - 1.28) | 0.76    | 13.6%                                                     | 1.26 (0.69, 2.31) | 0.45    |
| rs1122608  | T               | 25.5%                                                  | 1.18 (0.86, 1.63) | 0.31    | 26.2%                                              | 0.95 (0.70, 1.31) | 0.77    | 25.9%                                                  | 1.12 (0.90 - 1.38) | 0.31    | 4.1%                                                      | 0.91 (0.36, 2.32) | 0.85    |
| rs9982601  | T               | 12.0%                                                  | 0.75 (0.51, 1.09) | 0.13    | 10.7%                                              | 1.13 (0.77, 1.68) | 0.53    | 11.3%                                                  | 0.91 (0.70 - 1.18) | 0.48    | 25.8%                                                     | 0.57 (0.33, 0.97) | 0.039   |

<sup>a</sup> The minor allele was considered to be the least frequent allele across all series<sup>7</sup>. ORs and p-values result from logistic regression models adjusted for age and gender (Familial Caucasian series), age, gender, atrial fibrillation, CAD, diabetes, hypertension, and current smoking (ISGS Caucasian series), age, gender, and series (combined Caucasian series), and age, gender, CAD, diabetes, hypertension, and current smoking (ISGS African American series). ORs correspond to presence of the minor allele. SNP=single nucleotide polymorphism. MA=minor allele. MAF=minor allele frequency. OR=odds ratio. CI=confidence interval. ISGS=Ischemic Stroke Genetics Study.

**Online-only Table 2: Single SNP associations with ischemic stroke subtypes in the familial Caucasian series under an additive model**

| SNP        | MA <sup>a</sup> | MAF   | Association with cardioembolic stroke<br>(34 patients, 374 controls) |         | Association with large vessel stroke (67<br>patients, 374 controls) |         | Association with small vessel stroke (81<br>patients, 374 controls) |         |
|------------|-----------------|-------|----------------------------------------------------------------------|---------|---------------------------------------------------------------------|---------|---------------------------------------------------------------------|---------|
|            |                 |       | OR (95% CI)                                                          | P-value | OR (95% CI)                                                         | P-value | OR (95% CI)                                                         | P-value |
| rs646776   | C               | 19.8% | 1.40 (0.76 - 2.56)                                                   | 0.28    | 1.02 (0.63 - 1.65)                                                  | 0.94    | 1.04 (0.67 - 1.61)                                                  | 0.86    |
| rs11206510 | C               | 18.8% | 1.10 (0.60 - 2.02)                                                   | 0.76    | 0.92 (0.56 - 1.51)                                                  | 0.74    | 0.90 (0.58 - 1.41)                                                  | 0.64    |
| rs6725887  | C               | 12.8% | 0.29 (0.09 - 0.93)                                                   | 0.038   | 0.90 (0.51 - 1.56)                                                  | 0.70    | 0.93 (0.56 - 1.53)                                                  | 0.77    |
| rs9818870  | T               | 16.3% | 1.11 (0.60 - 2.07)                                                   | 0.74    | 0.57 (0.32 - 1.01)                                                  | 0.055   | 0.87 (0.55 - 1.38)                                                  | 0.55    |
| rs12526453 | G               | 35.2% | 0.95 (0.54 - 1.65)                                                   | 0.85    | 0.94 (0.62 - 1.42)                                                  | 0.77    | 0.97 (0.67 - 1.42)                                                  | 0.88    |
| rs6922269  | A               | 28.8% | 1.10 (0.64 - 1.89)                                                   | 0.74    | 0.65 (0.42 - 1.01)                                                  | 0.056   | 1.02 (0.70 - 1.48)                                                  | 0.92    |
| rs2048327  | C               | 34.8% | 0.95 (0.57 - 1.60)                                                   | 0.84    | 0.87 (0.59 - 1.28)                                                  | 0.48    | 0.73 (0.51 - 1.06)                                                  | 0.097   |
| rs3127599  | T               | 26.7% | 0.91 (0.51 - 1.62)                                                   | 0.75    | 1.24 (0.83 - 1.86)                                                  | 0.30    | 0.74 (0.49 - 1.12)                                                  | 0.16    |
| rs7767084  | C               | 17.0% | 1.00 (0.53 - 1.90)                                                   | 1.00    | 0.74 (0.43 - 1.27)                                                  | 0.27    | 1.10 (0.71 - 1.70)                                                  | 0.68    |
| rs10755578 | G               | 45.8% | 0.77 (0.46 - 1.30)                                                   | 0.33    | 0.98 (0.67 - 1.43)                                                  | 0.92    | 0.82 (0.58 - 1.17)                                                  | 0.27    |
| rs1333040  | C               | 41.0% | 1.60 (0.97 - 2.63)                                                   | 0.064   | 0.70 (0.47 - 1.04)                                                  | 0.075   | 1.12 (0.79 - 1.58)                                                  | 0.53    |
| rs4977574  | G               | 47.2% | 0.54 (0.32 - 0.91)                                                   | 0.021   | 1.32 (0.92 - 1.90)                                                  | 0.13    | 0.93 (0.67 - 1.30)                                                  | 0.67    |
| rs1333042  | A               | 50.8% | 1.57 (0.95 - 2.58)                                                   | 0.077   | 0.83 (0.58 - 1.18)                                                  | 0.29    | 1.09 (0.79 - 1.51)                                                  | 0.61    |
| rs2383207  | A               | 49.9% | 1.54 (0.94 - 2.53)                                                   | 0.089   | 0.85 (0.60 - 1.22)                                                  | 0.37    | 1.08 (0.78 - 1.49)                                                  | 0.66    |
| rs1746048  | T               | 14.4% | 1.08 (0.55 - 2.12)                                                   | 0.83    | 0.58 (0.31 - 1.07)                                                  | 0.080   | 1.02 (0.64 - 1.64)                                                  | 0.92    |
| rs2259816  | T               | 34.2% | 0.71 (0.41 - 1.23)                                                   | 0.22    | 1.01 (0.69 - 1.48)                                                  | 0.97    | 0.89 (0.62 - 1.27)                                                  | 0.52    |
| rs1048990  | G               | 16.9% | 0.42 (0.18 - 1.01)                                                   | 0.052   | 0.57 (0.32 - 1.02)                                                  | 0.057   | 0.87 (0.55 - 1.39)                                                  | 0.56    |
| rs17228212 | C               | 30.0% | 1.20 (0.69 - 2.09)                                                   | 0.51    | 1.14 (0.75 - 1.71)                                                  | 0.55    | 1.38 (0.96 - 1.99)                                                  | 0.086   |
| rs1122608  | T               | 25.5% | 1.30 (0.76 - 2.22)                                                   | 0.33    | 1.14 (0.75 - 1.73)                                                  | 0.55    | 1.10 (0.75 - 1.62)                                                  | 0.61    |
| rs9982601  | T               | 12.0% | 0.92 (0.41 - 2.06)                                                   | 0.84    | 0.86 (0.48 - 1.54)                                                  | 0.61    | 0.91 (0.53 - 1.57)                                                  | 0.73    |

<sup>a</sup> The minor allele was considered to be the least frequent allele across all series'. ORs and p-values result from logistic regression models adjusted for age and gender. ORs correspond to an additional minor allele. SNP=single nucleotide polymorphism. MA=minor allele. MAF=minor allele frequency. OR=odds ratio. CI=confidence interval.

**Online-only Table 3: Single SNP associations with ischemic stroke subtypes in the ISGS Caucasian series under an additive model**

| SNP        | MA <sup>a</sup> | MAF   | Association with cardioembolic stroke<br>(123 patients, 334 controls) |         | Association with large vessel stroke (90<br>patients, 334 controls) |         | Association with small vessel stroke (60<br>patients, 334 controls) |         |
|------------|-----------------|-------|-----------------------------------------------------------------------|---------|---------------------------------------------------------------------|---------|---------------------------------------------------------------------|---------|
|            |                 |       | OR (95% CI)                                                           | P-value | OR (95% CI)                                                         | P-value | OR (95% CI)                                                         | P-value |
| rs646776   | C               | 23.2% | 0.91 (0.62 - 1.35)                                                    | 0.65    | 1.17 (0.75 - 1.83)                                                  | 0.49    | 0.78 (0.45 - 1.35)                                                  | 0.37    |
| rs11206510 | C               | 19.3% | 0.96 (0.63 - 1.46)                                                    | 0.84    | 0.98 (0.62 - 1.56)                                                  | 0.93    | 0.71 (0.38 - 1.31)                                                  | 0.27    |
| rs6725887  | C               | 11.8% | 0.85 (0.51 - 1.41)                                                    | 0.52    | 0.73 (0.39 - 1.38)                                                  | 0.33    | 0.63 (0.29 - 1.36)                                                  | 0.24    |
| rs9818870  | T               | 16.2% | 0.99 (0.64 - 1.55)                                                    | 0.98    | 0.87 (0.51 - 1.48)                                                  | 0.60    | 0.86 (0.47 - 1.58)                                                  | 0.63    |
| rs12526453 | G               | 33.0% | 0.75 (0.51 - 1.09)                                                    | 0.13    | 1.16 (0.78 - 1.72)                                                  | 0.45    | 1.32 (0.86 - 2.04)                                                  | 0.21    |
| rs6922269  | A               | 29.1% | 1.00 (0.68 - 1.46)                                                    | 1.00    | 1.28 (0.83 - 1.99)                                                  | 0.27    | 2.26 (1.36 - 3.74)                                                  | 0.002   |
| rs2048327  | C               | 35.2% | 1.23 (0.86 - 1.75)                                                    | 0.26    | 1.35 (0.91 - 2.01)                                                  | 0.14    | 1.47 (0.93 - 2.33)                                                  | 0.096   |
| rs3127599  | T               | 31.7% | 1.11 (0.78 - 1.58)                                                    | 0.57    | 1.29 (0.86 - 1.93)                                                  | 0.22    | 1.48 (0.92 - 2.37)                                                  | 0.11    |
| rs7767084  | C               | 15.5% | 0.96 (0.60 - 1.54)                                                    | 0.85    | 0.96 (0.56 - 1.65)                                                  | 0.89    | 0.92 (0.49 - 1.72)                                                  | 0.79    |
| rs10755578 | G               | 47.1% | 1.08 (0.77 - 1.50)                                                    | 0.66    | 1.36 (0.94 - 1.98)                                                  | 0.11    | 1.52 (0.98 - 2.36)                                                  | 0.065   |
| rs1333040  | C               | 38.0% | 1.43 (1.02 - 2.00)                                                    | 0.037   | 0.95 (0.65 - 1.39)                                                  | 0.78    | 1.52 (0.98 - 2.37)                                                  | 0.062   |
| rs4977574  | G               | 51.3% | 0.79 (0.56 - 1.10)                                                    | 0.16    | 0.97 (0.67 - 1.41)                                                  | 0.88    | 0.66 (0.41 - 1.05)                                                  | 0.080   |
| rs1333042  | A               | 46.9% | 1.30 (0.93 - 1.82)                                                    | 0.12    | 1.03 (0.70 - 1.51)                                                  | 0.89    | 1.41 (0.90 - 2.23)                                                  | 0.14    |
| rs2383207  | A               | 45.9% | 1.30 (0.93 - 1.81)                                                    | 0.12    | 0.97 (0.66 - 1.41)                                                  | 0.86    | 1.37 (0.88 - 2.15)                                                  | 0.17    |
| rs1746048  | T               | 12.4% | 1.30 (0.77 - 2.21)                                                    | 0.33    | 0.93 (0.48 - 1.77)                                                  | 0.81    | 1.62 (0.79 - 3.31)                                                  | 0.19    |
| rs2259816  | T               | 35.4% | 1.34 (0.94 - 1.91)                                                    | 0.11    | 1.07 (0.72 - 1.59)                                                  | 0.73    | 1.63 (1.03 - 2.56)                                                  | 0.035   |
| rs1048990  | G               | 15.6% | 1.17 (0.74 - 1.86)                                                    | 0.50    | 0.70 (0.39 - 1.26)                                                  | 0.23    | 0.75 (0.38 - 1.49)                                                  | 0.41    |
| rs17228212 | C               | 29.0% | 0.90 (0.63 - 1.28)                                                    | 0.55    | 0.75 (0.50 - 1.13)                                                  | 0.17    | 0.81 (0.50 - 1.31)                                                  | 0.39    |
| rs1122608  | T               | 26.2% | 0.83 (0.56 - 1.22)                                                    | 0.34    | 1.03 (0.68 - 1.56)                                                  | 0.89    | 1.03 (0.64 - 1.68)                                                  | 0.89    |
| rs9982601  | T               | 10.7% | 1.20 (0.71 - 2.02)                                                    | 0.50    | 1.31 (0.74 - 2.31)                                                  | 0.36    | 1.84 (0.97 - 3.47)                                                  | 0.062   |

<sup>a</sup> The minor allele was considered to be the least frequent allele across all series'. ORs and p-values result from logistic regression models adjusted for age, gender, atrial fibrillation, coronary artery disease, diabetes, hypertension, and current smoking. ORs correspond to an additional minor allele. SNP=single nucleotide polymorphism. MA=minor allele. MAF=minor allele frequency. OR=odds ratio. CI=confidence interval. ISGS=Ischemic Stroke Genetics Study.

**Online-only Table 4a: Allele and genotype frequencies in the familial Caucasian series**

| SNP           | Minor allele count and proportion | Major allele count and proportion | Genotype 1 count and proportion | Genotype 2 count and proportion | Genotype 3 count and proportion |
|---------------|-----------------------------------|-----------------------------------|---------------------------------|---------------------------------|---------------------------------|
| rs646776      |                                   |                                   |                                 |                                 |                                 |
| Cases         | C: 106 (20%)                      | T: 420 (80%)                      | TT: 168 (64%)                   | CT: 84 (32%)                    | CC: 11 (3%)                     |
| Cardioembolic | C: 17 (25%)                       | T: 51 (75%)                       | TT: 18 (53%)                    | CT: 15 (44%)                    | CC: 1 (3%)                      |
| Small vessel  | C: 33 (20%)                       | T: 129 (80%)                      | TT: 51 (63%)                    | CT: 27 (33%)                    | CC: 3 (3%)                      |
| Large vessel  | C: 26 (19%)                       | T: 108 (81%)                      | TT: 43 (64%)                    | CT: 22 (33%)                    | CC: 2 (3%)                      |
| Controls      | C: 146 (20%)                      | T: 602 (80%)                      | TT: 239 (64%)                   | CT: 124 (33%)                   | CC: 11 (3%)                     |
| rs11206510    |                                   |                                   |                                 |                                 |                                 |
| Cases         | C: 99 (19%)                       | T: 427 (81%)                      | TT: 172 (65%)                   | CT: 83 (32%)                    | CC: 8 (3%)                      |
| Cardioembolic | C: 14 (21%)                       | T: 54 (79%)                       | TT: 22 (65%)                    | CT: 10 (29%)                    | CC: 2 (3%)                      |
| Small vessel  | C: 28 (17%)                       | T: 134 (83%)                      | TT: 55 (68%)                    | CT: 24 (30%)                    | CC: 2 (3%)                      |
| Large vessel  | C: 22 (16%)                       | T: 112 (84%)                      | TT: 46 (69%)                    | CT: 20 (30%)                    | CC: 1 (3%)                      |
| Controls      | C: 140 (19%)                      | T: 606 (81%)                      | TT: 248 (66%)                   | CT: 110 (29%)                   | CC: 15 (3%)                     |
| rs6725887     |                                   |                                   |                                 |                                 |                                 |
| Cases         | C: 59 (11%)                       | T: 467 (89%)                      | TT: 208 (79%)                   | CT: 51 (19%)                    | CC: 4 (3%)                      |
| Cardioembolic | C: 3 (4%)                         | T: 65 (96%)                       | TT: 31 (91%)                    | CT: 3 (9%)                      | CC: 0 (3%)                      |
| Small vessel  | C: 21 (13%)                       | T: 141 (87%)                      | TT: 61 (75%)                    | CT: 19 (23%)                    | CC: 1 (3%)                      |
| Large vessel  | C: 17 (13%)                       | T: 117 (87%)                      | TT: 51 (76%)                    | CT: 15 (22%)                    | CC: 1 (3%)                      |
| Controls      | C: 103 (14%)                      | T: 641 (86%)                      | TT: 276 (74%)                   | CT: 89 (24%)                    | CC: 7 (3%)                      |
| rs9818870     |                                   |                                   |                                 |                                 |                                 |
| Cases         | T: 78 (15%)                       | C: 448 (85%)                      | CC: 192 (73%)                   | TC: 64 (24%)                    | TT: 7 (3%)                      |
| Cardioembolic | T: 13 (19%)                       | C: 55 (81%)                       | CC: 23 (68%)                    | TC: 9 (26%)                     | TT: 2 (3%)                      |
| Small vessel  | T: 25 (15%)                       | C: 137 (85%)                      | CC: 58 (72%)                    | TC: 21 (26%)                    | TT: 2 (3%)                      |
| Large vessel  | T: 14 (10%)                       | C: 120 (90%)                      | CC: 54 (81%)                    | TC: 12 (18%)                    | TT: 1 (3%)                      |
| Controls      | T: 129 (17%)                      | C: 617 (83%)                      | CC: 257 (69%)                   | TC: 103 (28%)                   | TT: 13 (3%)                     |
| rs12526453    |                                   |                                   |                                 |                                 |                                 |
| Cases         | G: 192 (37%)                      | C: 334 (63%)                      | CC: 102 (39%)                   | GC: 130 (49%)                   | GG: 31 (3%)                     |
| Cardioembolic | G: 23 (34%)                       | C: 45 (66%)                       | CC: 14 (41%)                    | GC: 17 (50%)                    | GG: 3 (3%)                      |
| Small vessel  | G: 55 (34%)                       | C: 107 (66%)                      | CC: 34 (42%)                    | GC: 39 (48%)                    | GG: 8 (3%)                      |
| Large vessel  | G: 44 (33%)                       | C: 90 (67%)                       | CC: 29 (43%)                    | GC: 32 (48%)                    | GG: 6 (3%)                      |
| Controls      | G: 253 (34%)                      | C: 487 (66%)                      | CC: 153 (41%)                   | GC: 181 (49%)                   | GG: 36 (3%)                     |

**Online-only Table 4b: Allele and genotype frequencies in the familial Caucasian series**

| SNP           | Minor allele count and proportion | Major allele count and proportion | Genotype 1 count and proportion | Genotype 2 count and proportion | Genotype 3 count and proportion |
|---------------|-----------------------------------|-----------------------------------|---------------------------------|---------------------------------|---------------------------------|
| rs6922269     |                                   |                                   |                                 |                                 |                                 |
| Cases         | A: 138 (26%)                      | G: 388 (74%)                      | GG: 146 (56%)                   | AG: 96 (37%)                    | AA: 21 (3%)                     |
| Cardioembolic | A: 22 (32%)                       | G: 46 (68%)                       | GG: 15 (44%)                    | AG: 16 (47%)                    | AA: 3 (3%)                      |
| Small vessel  | A: 50 (31%)                       | G: 112 (69%)                      | GG: 39 (48%)                    | AG: 34 (42%)                    | AA: 8 (3%)                      |
| Large vessel  | A: 30 (22%)                       | G: 104 (78%)                      | GG: 42 (63%)                    | AG: 20 (30%)                    | AA: 5 (3%)                      |
| Controls      | A: 228 (31%)                      | G: 516 (69%)                      | GG: 176 (47%)                   | AG: 164 (44%)                   | AA: 32 (3%)                     |
| rs2048327     |                                   |                                   |                                 |                                 |                                 |
| Cases         | C: 171 (33%)                      | T: 355 (67%)                      | TT: 115 (44%)                   | CT: 125 (48%)                   | CC: 23 (3%)                     |
| Cardioembolic | C: 24 (35%)                       | T: 44 (65%)                       | TT: 13 (38%)                    | CT: 18 (53%)                    | CC: 3 (3%)                      |
| Small vessel  | C: 48 (30%)                       | T: 114 (70%)                      | TT: 40 (49%)                    | CT: 34 (42%)                    | CC: 7 (3%)                      |
| Large vessel  | C: 44 (33%)                       | T: 90 (67%)                       | TT: 29 (43%)                    | CT: 32 (48%)                    | CC: 6 (3%)                      |
| Controls      | C: 270 (36%)                      | T: 472 (64%)                      | TT: 153 (41%)                   | CT: 166 (45%)                   | CC: 52 (3%)                     |
| rs3127599     |                                   |                                   |                                 |                                 |                                 |
| Cases         | T: 141 (27%)                      | C: 381 (73%)                      | CC: 140 (54%)                   | TC: 101 (39%)                   | TT: 20 (3%)                     |
| Cardioembolic | T: 17 (25%)                       | C: 51 (75%)                       | CC: 18 (53%)                    | TC: 15 (44%)                    | TT: 1 (3%)                      |
| Small vessel  | T: 34 (21%)                       | C: 126 (79%)                      | CC: 49 (61%)                    | TC: 28 (35%)                    | TT: 3 (3%)                      |
| Large vessel  | T: 40 (30%)                       | C: 92 (70%)                       | CC: 32 (48%)                    | TC: 28 (42%)                    | TT: 6 (3%)                      |
| Controls      | T: 198 (27%)                      | C: 548 (73%)                      | CC: 202 (54%)                   | TC: 144 (39%)                   | TT: 27 (3%)                     |
| rs7767084     |                                   |                                   |                                 |                                 |                                 |
| Cases         | C: 85 (16%)                       | T: 441 (84%)                      | TT: 184 (70%)                   | CT: 73 (28%)                    | CC: 6 (3%)                      |
| Cardioembolic | C: 12 (18%)                       | T: 56 (82%)                       | TT: 24 (71%)                    | CT: 8 (24%)                     | CC: 2 (3%)                      |
| Small vessel  | C: 31 (19%)                       | T: 131 (81%)                      | TT: 51 (63%)                    | CT: 29 (36%)                    | CC: 1 (3%)                      |
| Large vessel  | C: 18 (13%)                       | T: 116 (87%)                      | TT: 49 (73%)                    | CT: 18 (27%)                    | CC: 0 (3%)                      |
| Controls      | C: 132 (18%)                      | T: 616 (82%)                      | TT: 255 (68%)                   | CT: 106 (28%)                   | CC: 13 (3%)                     |
| rs10755578    |                                   |                                   |                                 |                                 |                                 |
| Cases         | G: 231 (44%)                      | C: 295 (56%)                      | CC: 78 (30%)                    | GC: 139 (53%)                   | GG: 46 (3%)                     |
| Cardioembolic | G: 28 (41%)                       | C: 40 (59%)                       | CC: 10 (29%)                    | GC: 20 (59%)                    | GG: 4 (3%)                      |
| Small vessel  | G: 69 (43%)                       | C: 93 (57%)                       | CC: 24 (30%)                    | GC: 45 (56%)                    | GG: 12 (3%)                     |
| Large vessel  | G: 61 (46%)                       | C: 73 (54%)                       | CC: 18 (27%)                    | GC: 37 (55%)                    | GG: 12 (3%)                     |
| Controls      | G: 352 (47%)                      | C: 396 (53%)                      | CC: 103 (28%)                   | GC: 190 (51%)                   | GG: 81 (3%)                     |

**Online-only Table 4c: Allele and genotype frequencies in the familial Caucasian series**

| SNP           | Minor allele count and proportion | Major allele count and proportion | Genotype 1 count and proportion | Genotype 2 count and proportion | Genotype 3 count and proportion |
|---------------|-----------------------------------|-----------------------------------|---------------------------------|---------------------------------|---------------------------------|
| rs1333040     |                                   |                                   |                                 |                                 |                                 |
| Cases         | C: 215 (41%)                      | T: 313 (59%)                      | TT: 93 (35%)                    | CT: 127 (48%)                   | CC: 44 (3%)                     |
| Cardioembolic | C: 36 (53%)                       | T: 32 (47%)                       | TT: 8 (24%)                     | CT: 16 (47%)                    | CC: 10 (3%)                     |
| Small vessel  | C: 71 (44%)                       | T: 91 (56%)                       | TT: 24 (30%)                    | CT: 43 (53%)                    | CC: 14 (3%)                     |
| Large vessel  | C: 44 (33%)                       | T: 90 (67%)                       | TT: 28 (42%)                    | CT: 34 (51%)                    | CC: 5 (3%)                      |
| Controls      | C: 307 (41%)                      | T: 439 (59%)                      | TT: 130 (35%)                   | CT: 179 (48%)                   | CC: 64 (3%)                     |
| rs4977574     |                                   |                                   |                                 |                                 |                                 |
| Cases         | G: 244 (46%)                      | A: 282 (54%)                      | AA: 76 (29%)                    | GA: 130 (49%)                   | GG: 57 (3%)                     |
| Cardioembolic | G: 22 (32%)                       | A: 46 (68%)                       | AA: 14 (41%)                    | GA: 18 (53%)                    | GG: 2 (3%)                      |
| Small vessel  | G: 74 (46%)                       | A: 88 (54%)                       | AA: 25 (31%)                    | GA: 38 (47%)                    | GG: 18 (3%)                     |
| Large vessel  | G: 74 (55%)                       | A: 60 (45%)                       | AA: 14 (21%)                    | GA: 32 (48%)                    | GG: 21 (3%)                     |
| Controls      | G: 355 (48%)                      | A: 389 (52%)                      | AA: 109 (29%)                   | GA: 171 (46%)                   | GG: 92 (3%)                     |
| rs1333042     |                                   |                                   |                                 |                                 |                                 |
| Cases         | A: 273 (52%)                      | G: 253 (48%)                      | GG: 60 (23%)                    | AG: 133 (51%)                   | AA: 70 (3%)                     |
| Cardioembolic | A: 42 (62%)                       | G: 26 (38%)                       | GG: 2 (6%)                      | AG: 22 (65%)                    | AA: 10 (3%)                     |
| Small vessel  | A: 85 (52%)                       | G: 77 (48%)                       | GG: 19 (23%)                    | AG: 39 (48%)                    | AA: 23 (3%)                     |
| Large vessel  | A: 60 (45%)                       | G: 74 (55%)                       | GG: 21 (31%)                    | AG: 32 (48%)                    | AA: 14 (3%)                     |
| Controls      | A: 373 (50%)                      | G: 373 (50%)                      | GG: 103 (28%)                   | AG: 167 (45%)                   | AA: 103 (3%)                    |
| rs2383207     |                                   |                                   |                                 |                                 |                                 |
| Cases         | A: 269 (51%)                      | G: 259 (49%)                      | GG: 64 (24%)                    | AG: 131 (50%)                   | AA: 69 (3%)                     |
| Cardioembolic | A: 41 (60%)                       | G: 27 (40%)                       | GG: 2 (6%)                      | AG: 23 (68%)                    | AA: 9 (3%)                      |
| Small vessel  | A: 83 (51%)                       | G: 79 (49%)                       | GG: 21 (26%)                    | AG: 37 (46%)                    | AA: 23 (3%)                     |
| Large vessel  | A: 60 (45%)                       | G: 74 (55%)                       | GG: 21 (31%)                    | AG: 32 (48%)                    | AA: 14 (3%)                     |
| Controls      | A: 367 (49%)                      | G: 379 (51%)                      | GG: 105 (28%)                   | AG: 169 (45%)                   | AA: 99 (3%)                     |
| rs1746048     |                                   |                                   |                                 |                                 |                                 |
| Cases         | T: 71 (13%)                       | C: 455 (87%)                      | CC: 197 (75%)                   | TC: 61 (23%)                    | TT: 5 (3%)                      |
| Cardioembolic | T: 11 (16%)                       | C: 57 (84%)                       | CC: 25 (74%)                    | TC: 7 (21%)                     | TT: 2 (3%)                      |
| Small vessel  | T: 25 (15%)                       | C: 137 (85%)                      | CC: 59 (73%)                    | TC: 19 (23%)                    | TT: 3 (3%)                      |
| Large vessel  | T: 13 (10%)                       | C: 121 (90%)                      | CC: 54 (81%)                    | TC: 13 (19%)                    | TT: 0 (3%)                      |
| Controls      | T: 113 (15%)                      | C: 635 (85%)                      | CC: 269 (72%)                   | TC: 97 (26%)                    | TT: 8 (3%)                      |

**Online-only Table 4d: Allele and genotype frequencies in the familial Caucasian series**

| SNP           | Minor allele count and proportion | Major allele count and proportion | Genotype 1 count and proportion | Genotype 2 count and proportion | Genotype 3 count and proportion |
|---------------|-----------------------------------|-----------------------------------|---------------------------------|---------------------------------|---------------------------------|
| rs2259816     |                                   |                                   |                                 |                                 |                                 |
| Cases         | T: 171 (33%)                      | G: 355 (67%)                      | GG: 124 (47%)                   | TG: 107 (41%)                   | TT: 32 (3%)                     |
| Cardioembolic | T: 19 (28%)                       | G: 49 (72%)                       | GG: 18 (53%)                    | TG: 13 (38%)                    | TT: 3 (3%)                      |
| Small vessel  | T: 53 (33%)                       | G: 109 (67%)                      | GG: 38 (47%)                    | TG: 33 (41%)                    | TT: 10 (3%)                     |
| Large vessel  | T: 47 (35%)                       | G: 87 (65%)                       | GG: 29 (43%)                    | TG: 29 (43%)                    | TT: 9 (3%)                      |
| Controls      | T: 262 (35%)                      | G: 478 (65%)                      | GG: 154 (42%)                   | TG: 170 (46%)                   | TT: 46 (3%)                     |
| rs1048990     |                                   |                                   |                                 |                                 |                                 |
| Cases         | G: 75 (14%)                       | C: 449 (86%)                      | CC: 189 (72%)                   | GC: 71 (27%)                    | GG: 2 (3%)                      |
| Cardioembolic | G: 6 (9%)                         | C: 62 (91%)                       | CC: 28 (82%)                    | GC: 6 (18%)                     | GG: 0 (3%)                      |
| Small vessel  | G: 27 (17%)                       | C: 135 (83%)                      | CC: 55 (68%)                    | GC: 25 (31%)                    | GG: 1 (3%)                      |
| Large vessel  | G: 16 (12%)                       | C: 118 (88%)                      | CC: 51 (76%)                    | GC: 16 (24%)                    | GG: 0 (3%)                      |
| Controls      | G: 137 (19%)                      | C: 597 (81%)                      | CC: 241 (66%)                   | GC: 115 (31%)                   | GG: 11 (3%)                     |
| rs17228212    |                                   |                                   |                                 |                                 |                                 |
| Cases         | C: 171 (33%)                      | T: 355 (67%)                      | TT: 115 (44%)                   | CT: 125 (48%)                   | CC: 23 (3%)                     |
| Cardioembolic | C: 22 (32%)                       | T: 46 (68%)                       | TT: 14 (41%)                    | CT: 18 (53%)                    | CC: 2 (3%)                      |
| Small vessel  | C: 57 (35%)                       | T: 105 (65%)                      | TT: 35 (43%)                    | CT: 35 (43%)                    | CC: 11 (3%)                     |
| Large vessel  | C: 41 (31%)                       | T: 93 (69%)                       | TT: 31 (46%)                    | CT: 31 (46%)                    | CC: 5 (3%)                      |
| Controls      | C: 210 (28%)                      | T: 534 (72%)                      | TT: 188 (51%)                   | CT: 158 (42%)                   | CC: 26 (3%)                     |
| rs1122608     |                                   |                                   |                                 |                                 |                                 |
| Cases         | T: 144 (27%)                      | G: 382 (73%)                      | GG: 143 (54%)                   | TG: 96 (37%)                    | TT: 24 (3%)                     |
| Cardioembolic | T: 20 (29%)                       | G: 48 (71%)                       | GG: 18 (53%)                    | TG: 12 (35%)                    | TT: 4 (3%)                      |
| Small vessel  | T: 42 (26%)                       | G: 120 (74%)                      | GG: 45 (56%)                    | TG: 30 (37%)                    | TT: 6 (3%)                      |
| Large vessel  | T: 35 (26%)                       | G: 99 (74%)                       | GG: 37 (55%)                    | TG: 25 (37%)                    | TT: 5 (3%)                      |
| Controls      | T: 180 (24%)                      | G: 564 (76%)                      | GG: 217 (58%)                   | TG: 130 (35%)                   | TT: 25 (3%)                     |
| rs9982601     |                                   |                                   |                                 |                                 |                                 |
| Cases         | T: 57 (11%)                       | C: 469 (89%)                      | CC: 211 (80%)                   | TC: 47 (18%)                    | TT: 5 (3%)                      |
| Cardioembolic | T: 8 (12%)                        | C: 60 (88%)                       | CC: 26 (76%)                    | TC: 8 (24%)                     | TT: 0 (3%)                      |
| Small vessel  | T: 19 (12%)                       | C: 143 (88%)                      | CC: 63 (78%)                    | TC: 17 (21%)                    | TT: 1 (3%)                      |
| Large vessel  | T: 15 (11%)                       | C: 119 (89%)                      | CC: 55 (82%)                    | TC: 9 (13%)                     | TT: 3 (3%)                      |
| Controls      | T: 96 (13%)                       | C: 652 (87%)                      | CC: 281 (75%)                   | TC: 90 (24%)                    | TT: 3 (3%)                      |

**Online-only Table 5a: Allele and genotype frequencies in the ISGS Caucasian series**

| SNP           | Minor allele count and proportion | Major allele count and proportion | Genotype 1 count and proportion | Genotype 2 count and proportion | Genotype 3 count and proportion |
|---------------|-----------------------------------|-----------------------------------|---------------------------------|---------------------------------|---------------------------------|
| rs646776      |                                   |                                   |                                 |                                 |                                 |
| Cases         | C: 213 (24%)                      | T: 685 (76%)                      | TT: 263 (59%)                   | CT: 159 (35%)                   | CC: 27 (3%)                     |
| Cardioembolic | C: 49 (20%)                       | T: 197 (80%)                      | TT: 80 (65%)                    | CT: 37 (30%)                    | CC: 6 (3%)                      |
| Small vessel  | C: 23 (19%)                       | T: 97 (81%)                       | TT: 39 (65%)                    | CT: 19 (32%)                    | CC: 2 (3%)                      |
| Large vessel  | C: 43 (24%)                       | T: 137 (76%)                      | TT: 51 (57%)                    | CT: 35 (39%)                    | CC: 4 (3%)                      |
| Controls      | C: 151 (23%)                      | T: 517 (77%)                      | TT: 204 (61%)                   | CT: 109 (33%)                   | CC: 21 (3%)                     |
| rs11206510    |                                   |                                   |                                 |                                 |                                 |
| Cases         | C: 171 (19%)                      | T: 725 (81%)                      | TT: 291 (65%)                   | CT: 143 (32%)                   | CC: 14 (3%)                     |
| Cardioembolic | C: 43 (17%)                       | T: 203 (83%)                      | TT: 85 (69%)                    | CT: 33 (27%)                    | CC: 5 (3%)                      |
| Small vessel  | C: 19 (16%)                       | T: 99 (84%)                       | TT: 40 (68%)                    | CT: 19 (32%)                    | CC: 0 (3%)                      |
| Large vessel  | C: 36 (20%)                       | T: 144 (80%)                      | TT: 57 (63%)                    | CT: 30 (33%)                    | CC: 3 (3%)                      |
| Controls      | C: 131 (20%)                      | T: 537 (80%)                      | TT: 218 (65%)                   | CT: 101 (30%)                   | CC: 15 (3%)                     |
| rs6725887     |                                   |                                   |                                 |                                 |                                 |
| Cases         | C: 102 (11%)                      | T: 794 (89%)                      | TT: 350 (78%)                   | CT: 94 (21%)                    | CC: 4 (3%)                      |
| Cardioembolic | C: 30 (12%)                       | T: 214 (88%)                      | TT: 94 (77%)                    | CT: 26 (21%)                    | CC: 2 (3%)                      |
| Small vessel  | C: 10 (8%)                        | T: 110 (92%)                      | TT: 50 (83%)                    | CT: 10 (17%)                    | CC: 0 (3%)                      |
| Large vessel  | C: 15 (8%)                        | T: 165 (92%)                      | TT: 75 (83%)                    | CT: 15 (17%)                    | CC: 0 (3%)                      |
| Controls      | C: 83 (12%)                       | T: 585 (88%)                      | TT: 256 (77%)                   | CT: 73 (22%)                    | CC: 5 (3%)                      |
| rs9818870     |                                   |                                   |                                 |                                 |                                 |
| Cases         | T: 136 (15%)                      | C: 762 (85%)                      | CC: 324 (72%)                   | TC: 114 (25%)                   | TT: 11 (3%)                     |
| Cardioembolic | T: 43 (17%)                       | C: 203 (83%)                      | CC: 84 (68%)                    | TC: 35 (28%)                    | TT: 4 (3%)                      |
| Small vessel  | T: 19 (16%)                       | C: 101 (84%)                      | CC: 44 (73%)                    | TC: 13 (22%)                    | TT: 3 (3%)                      |
| Large vessel  | T: 27 (15%)                       | C: 153 (85%)                      | CC: 64 (71%)                    | TC: 25 (28%)                    | TT: 1 (3%)                      |
| Controls      | T: 117 (18%)                      | C: 551 (82%)                      | CC: 225 (67%)                   | TC: 101 (30%)                   | TT: 8 (3%)                      |
| rs12526453    |                                   |                                   |                                 |                                 |                                 |
| Cases         | G: 296 (33%)                      | C: 602 (67%)                      | CC: 201 (45%)                   | GC: 200 (45%)                   | GG: 48 (3%)                     |
| Cardioembolic | G: 69 (28%)                       | C: 177 (72%)                      | CC: 60 (49%)                    | GC: 57 (46%)                    | GG: 6 (3%)                      |
| Small vessel  | G: 45 (38%)                       | C: 75 (63%)                       | CC: 28 (47%)                    | GC: 19 (32%)                    | GG: 13 (3%)                     |
| Large vessel  | G: 64 (36%)                       | C: 116 (64%)                      | CC: 36 (40%)                    | GC: 44 (49%)                    | GG: 10 (3%)                     |
| Controls      | G: 221 (33%)                      | C: 447 (67%)                      | CC: 149 (45%)                   | GC: 149 (45%)                   | GG: 36 (3%)                     |



**Online-only Table 5b: Allele and genotype frequencies in the ISGS Caucasian series**

| SNP           | Minor allele count and proportion | Major allele count and proportion | Genotype 1 count and proportion | Genotype 2 count and proportion | Genotype 3 count and proportion |
|---------------|-----------------------------------|-----------------------------------|---------------------------------|---------------------------------|---------------------------------|
| rs6922269     |                                   |                                   |                                 |                                 |                                 |
| Cases         | A: 278 (31%)                      | G: 620 (69%)                      | GG: 211 (47%)                   | AG: 198 (44%)                   | AA: 40 (3%)                     |
| Cardioembolic | A: 63 (26%)                       | G: 183 (74%)                      | GG: 72 (59%)                    | AG: 39 (32%)                    | AA: 12 (3%)                     |
| Small vessel  | A: 46 (38%)                       | G: 74 (62%)                       | GG: 21 (35%)                    | AG: 32 (53%)                    | AA: 7 (3%)                      |
| Large vessel  | A: 54 (30%)                       | G: 126 (70%)                      | GG: 41 (46%)                    | AG: 44 (49%)                    | AA: 5 (3%)                      |
| Controls      | A: 178 (27%)                      | G: 490 (73%)                      | GG: 176 (53%)                   | AG: 138 (41%)                   | AA: 20 (3%)                     |
| rs2048327     |                                   |                                   |                                 |                                 |                                 |
| Cases         | C: 337 (38%)                      | T: 559 (62%)                      | TT: 169 (38%)                   | CT: 221 (49%)                   | CC: 58 (3%)                     |
| Cardioembolic | C: 94 (39%)                       | T: 150 (61%)                      | TT: 46 (38%)                    | CT: 58 (48%)                    | CC: 18 (3%)                     |
| Small vessel  | C: 49 (41%)                       | T: 71 (59%)                       | TT: 22 (37%)                    | CT: 27 (45%)                    | CC: 11 (3%)                     |
| Large vessel  | C: 67 (37%)                       | T: 113 (63%)                      | TT: 36 (40%)                    | CT: 41 (46%)                    | CC: 13 (3%)                     |
| Controls      | C: 214 (32%)                      | T: 454 (68%)                      | TT: 151 (45%)                   | CT: 152 (46%)                   | CC: 31 (3%)                     |
| rs3127599     |                                   |                                   |                                 |                                 |                                 |
| Cases         | T: 292 (33%)                      | C: 600 (67%)                      | CC: 202 (45%)                   | TC: 196 (44%)                   | TT: 48 (3%)                     |
| Cardioembolic | T: 80 (33%)                       | C: 164 (67%)                      | CC: 57 (47%)                    | TC: 50 (41%)                    | TT: 15 (3%)                     |
| Small vessel  | T: 43 (36%)                       | C: 75 (64%)                       | CC: 25 (42%)                    | TC: 25 (42%)                    | TT: 9 (3%)                      |
| Large vessel  | T: 62 (34%)                       | C: 118 (66%)                      | CC: 37 (41%)                    | TC: 44 (49%)                    | TT: 9 (3%)                      |
| Controls      | T: 202 (30%)                      | C: 466 (70%)                      | CC: 163 (49%)                   | TC: 140 (42%)                   | TT: 31 (3%)                     |
| rs7767084     |                                   |                                   |                                 |                                 |                                 |
| Cases         | C: 137 (15%)                      | T: 761 (85%)                      | TT: 318 (71%)                   | CT: 125 (28%)                   | CC: 6 (3%)                      |
| Cardioembolic | C: 40 (16%)                       | T: 206 (84%)                      | TT: 86 (70%)                    | CT: 34 (28%)                    | CC: 3 (3%)                      |
| Small vessel  | C: 18 (15%)                       | T: 102 (85%)                      | TT: 43 (72%)                    | CT: 16 (27%)                    | CC: 1 (3%)                      |
| Large vessel  | C: 24 (13%)                       | T: 156 (87%)                      | TT: 66 (73%)                    | CT: 24 (27%)                    | CC: 0 (3%)                      |
| Controls      | C: 105 (16%)                      | T: 563 (84%)                      | TT: 236 (71%)                   | CT: 91 (27%)                    | CC: 7 (3%)                      |
| rs10755578    |                                   |                                   |                                 |                                 |                                 |
| Cases         | G: 436 (49%)                      | C: 460 (51%)                      | CC: 114 (25%)                   | GC: 232 (52%)                   | GG: 102 (3%)                    |
| Cardioembolic | G: 118 (48%)                      | C: 126 (52%)                      | CC: 32 (26%)                    | GC: 62 (51%)                    | GG: 28 (3%)                     |
| Small vessel  | G: 64 (53%)                       | C: 56 (47%)                       | CC: 13 (22%)                    | GC: 30 (50%)                    | GG: 17 (3%)                     |
| Large vessel  | G: 88 (49%)                       | C: 92 (51%)                       | CC: 21 (23%)                    | GC: 50 (56%)                    | GG: 19 (3%)                     |
| Controls      | G: 301 (45%)                      | C: 367 (55%)                      | CC: 102 (31%)                   | GC: 163 (49%)                   | GG: 69 (3%)                     |

**Online-only Table 5c: Allele and genotype frequencies in the ISGS Caucasian series**

| SNP           | Minor allele count and proportion | Major allele count and proportion | Genotype 1 count and proportion | Genotype 2 count and proportion | Genotype 3 count and proportion |
|---------------|-----------------------------------|-----------------------------------|---------------------------------|---------------------------------|---------------------------------|
| rs1333040     |                                   |                                   |                                 |                                 |                                 |
| Cases         | C: 362 (40%)                      | T: 536 (60%)                      | TT: 158 (35%)                   | CT: 220 (49%)                   | CC: 71 (3%)                     |
| Cardioembolic | C: 112 (46%)                      | T: 134 (54%)                      | TT: 36 (29%)                    | CT: 62 (50%)                    | CC: 25 (3%)                     |
| Small vessel  | C: 56 (47%)                       | T: 64 (53%)                       | TT: 16 (27%)                    | CT: 32 (53%)                    | CC: 12 (3%)                     |
| Large vessel  | C: 65 (36%)                       | T: 115 (64%)                      | TT: 37 (41%)                    | CT: 41 (46%)                    | CC: 12 (3%)                     |
| Controls      | C: 232 (35%)                      | T: 434 (65%)                      | TT: 146 (44%)                   | CT: 142 (43%)                   | CC: 45 (3%)                     |
| rs4977574     |                                   |                                   |                                 |                                 |                                 |
| Cases         | G: 450 (50%)                      | A: 448 (50%)                      | AA: 113 (25%)                   | GA: 222 (49%)                   | GG: 114 (3%)                    |
| Cardioembolic | G: 110 (45%)                      | A: 136 (55%)                      | AA: 40 (33%)                    | GA: 56 (46%)                    | GG: 27 (3%)                     |
| Small vessel  | G: 50 (42%)                       | A: 70 (58%)                       | AA: 17 (28%)                    | GA: 36 (60%)                    | GG: 7 (3%)                      |
| Large vessel  | G: 92 (51%)                       | A: 88 (49%)                       | AA: 22 (24%)                    | GA: 44 (49%)                    | GG: 24 (3%)                     |
| Controls      | G: 353 (53%)                      | A: 315 (47%)                      | AA: 73 (22%)                    | GA: 169 (51%)                   | GG: 92 (3%)                     |
| rs1333042     |                                   |                                   |                                 |                                 |                                 |
| Cases         | A: 431 (48%)                      | G: 467 (52%)                      | GG: 124 (28%)                   | AG: 219 (49%)                   | AA: 106 (3%)                    |
| Cardioembolic | A: 133 (54%)                      | G: 113 (46%)                      | GG: 29 (24%)                    | AG: 55 (45%)                    | AA: 39 (3%)                     |
| Small vessel  | A: 66 (55%)                       | G: 54 (45%)                       | GG: 11 (18%)                    | AG: 32 (53%)                    | AA: 17 (3%)                     |
| Large vessel  | A: 86 (48%)                       | G: 94 (52%)                       | GG: 24 (27%)                    | AG: 46 (51%)                    | AA: 20 (3%)                     |
| Controls      | A: 304 (46%)                      | G: 364 (54%)                      | GG: 96 (29%)                    | AG: 172 (51%)                   | AA: 66 (3%)                     |
| rs2383207     |                                   |                                   |                                 |                                 |                                 |
| Cases         | A: 420 (47%)                      | G: 478 (53%)                      | GG: 129 (29%)                   | AG: 220 (49%)                   | AA: 100 (3%)                    |
| Cardioembolic | A: 130 (53%)                      | G: 116 (47%)                      | GG: 30 (24%)                    | AG: 56 (46%)                    | AA: 37 (3%)                     |
| Small vessel  | A: 65 (54%)                       | G: 55 (46%)                       | GG: 12 (20%)                    | AG: 31 (52%)                    | AA: 17 (3%)                     |
| Large vessel  | A: 82 (46%)                       | G: 98 (54%)                       | GG: 26 (29%)                    | AG: 46 (51%)                    | AA: 18 (3%)                     |
| Controls      | A: 299 (45%)                      | G: 369 (55%)                      | GG: 101 (30%)                   | AG: 167 (50%)                   | AA: 66 (3%)                     |
| rs1746048     |                                   |                                   |                                 |                                 |                                 |
| Cases         | T: 116 (13%)                      | C: 782 (87%)                      | CC: 340 (76%)                   | TC: 102 (23%)                   | TT: 7 (3%)                      |
| Cardioembolic | T: 30 (12%)                       | C: 216 (88%)                      | CC: 95 (77%)                    | TC: 26 (21%)                    | TT: 2 (3%)                      |
| Small vessel  | T: 16 (13%)                       | C: 104 (87%)                      | CC: 45 (75%)                    | TC: 14 (23%)                    | TT: 1 (3%)                      |
| Large vessel  | T: 19 (11%)                       | C: 161 (89%)                      | CC: 71 (79%)                    | TC: 19 (21%)                    | TT: 0 (3%)                      |
| Controls      | T: 78 (12%)                       | C: 590 (88%)                      | CC: 257 (77%)                   | TC: 76 (23%)                    | TT: 1 (3%)                      |

**Online-only Table 5d: Allele and genotype frequencies in the ISGS Caucasian series**

| SNP           | Minor allele count and proportion | Major allele count and proportion | Genotype 1 count and proportion | Genotype 2 count and proportion | Genotype 3 count and proportion |
|---------------|-----------------------------------|-----------------------------------|---------------------------------|---------------------------------|---------------------------------|
| rs2259816     |                                   |                                   |                                 |                                 |                                 |
| Cases         | T: 326 (36%)                      | G: 572 (64%)                      | GG: 177 (39%)                   | TG: 218 (49%)                   | TT: 54 (3%)                     |
| Cardioembolic | T: 97 (39%)                       | G: 149 (61%)                      | GG: 41 (33%)                    | TG: 67 (54%)                    | TT: 15 (3%)                     |
| Small vessel  | T: 49 (41%)                       | G: 71 (59%)                       | GG: 20 (33%)                    | TG: 31 (52%)                    | TT: 9 (3%)                      |
| Large vessel  | T: 61 (34%)                       | G: 119 (66%)                      | GG: 40 (44%)                    | TG: 39 (43%)                    | TT: 11 (3%)                     |
| Controls      | T: 229 (34%)                      | G: 439 (66%)                      | GG: 146 (44%)                   | TG: 147 (44%)                   | TT: 41 (3%)                     |
| rs1048990     |                                   |                                   |                                 |                                 |                                 |
| Cases         | G: 133 (15%)                      | C: 765 (85%)                      | CC: 319 (71%)                   | GC: 127 (28%)                   | GG: 3 (3%)                      |
| Cardioembolic | G: 44 (18%)                       | C: 202 (82%)                      | CC: 81 (66%)                    | GC: 40 (33%)                    | GG: 2 (3%)                      |
| Small vessel  | G: 16 (13%)                       | C: 104 (87%)                      | CC: 44 (73%)                    | GC: 16 (27%)                    | GG: 0 (3%)                      |
| Large vessel  | G: 23 (13%)                       | C: 157 (87%)                      | CC: 67 (74%)                    | GC: 23 (26%)                    | GG: 0 (3%)                      |
| Controls      | G: 112 (17%)                      | C: 556 (83%)                      | CC: 227 (68%)                   | GC: 102 (31%)                   | GG: 5 (3%)                      |
| rs17228212    |                                   |                                   |                                 |                                 |                                 |
| Cases         | C: 250 (28%)                      | T: 648 (72%)                      | TT: 238 (53%)                   | CT: 172 (38%)                   | CC: 39 (3%)                     |
| Cardioembolic | C: 81 (33%)                       | T: 165 (67%)                      | TT: 57 (46%)                    | CT: 51 (41%)                    | CC: 15 (3%)                     |
| Small vessel  | C: 35 (29%)                       | T: 85 (71%)                       | TT: 30 (50%)                    | CT: 25 (42%)                    | CC: 5 (3%)                      |
| Large vessel  | C: 49 (27%)                       | T: 131 (73%)                      | TT: 50 (56%)                    | CT: 31 (34%)                    | CC: 9 (3%)                      |
| Controls      | C: 204 (31%)                      | T: 464 (69%)                      | TT: 163 (49%)                   | CT: 138 (41%)                   | CC: 33 (3%)                     |
| rs1122608     |                                   |                                   |                                 |                                 |                                 |
| Cases         | T: 239 (27%)                      | G: 659 (73%)                      | GG: 245 (55%)                   | TG: 169 (38%)                   | TT: 35 (3%)                     |
| Cardioembolic | T: 62 (25%)                       | G: 184 (75%)                      | GG: 67 (54%)                    | TG: 50 (41%)                    | TT: 6 (3%)                      |
| Small vessel  | T: 33 (28%)                       | G: 87 (73%)                       | GG: 33 (55%)                    | TG: 21 (35%)                    | TT: 6 (3%)                      |
| Large vessel  | T: 50 (28%)                       | G: 130 (72%)                      | GG: 46 (51%)                    | TG: 38 (42%)                    | TT: 6 (3%)                      |
| Controls      | T: 172 (26%)                      | G: 496 (74%)                      | GG: 186 (56%)                   | TG: 124 (37%)                   | TT: 24 (3%)                     |
| rs9982601     |                                   |                                   |                                 |                                 |                                 |
| Cases         | T: 99 (11%)                       | C: 799 (89%)                      | CC: 358 (80%)                   | TC: 83 (18%)                    | TT: 8 (3%)                      |
| Cardioembolic | T: 27 (11%)                       | C: 219 (89%)                      | CC: 98 (80%)                    | TC: 23 (19%)                    | TT: 2 (3%)                      |
| Small vessel  | T: 18 (15%)                       | C: 102 (85%)                      | CC: 44 (73%)                    | TC: 14 (23%)                    | TT: 2 (3%)                      |
| Large vessel  | T: 23 (13%)                       | C: 157 (87%)                      | CC: 70 (78%)                    | TC: 17 (19%)                    | TT: 3 (3%)                      |
| Controls      | T: 69 (10%)                       | C: 599 (90%)                      | CC: 269 (81%)                   | TC: 61 (18%)                    | TT: 4 (3%)                      |

**Online-only Table 6a: Allele and genotype frequencies in the combined Caucasian series**

| SNP           | Minor allele count and proportion | Major allele count and proportion | Genotype 1 count and proportion | Genotype 2 count and proportion | Genotype 3 count and proportion |
|---------------|-----------------------------------|-----------------------------------|---------------------------------|---------------------------------|---------------------------------|
| rs646776      |                                   |                                   |                                 |                                 |                                 |
| Cases         | C: 319 (22%)                      | T: 1105 (78%)                     | TT: 431 (61%)                   | CT: 243 (34%)                   | CC: 38 (3%)                     |
| Cardioembolic | C: 66 (21%)                       | T: 248 (79%)                      | TT: 98 (62%)                    | CT: 52 (33%)                    | CC: 7 (3%)                      |
| Small vessel  | C: 56 (20%)                       | T: 226 (80%)                      | TT: 90 (64%)                    | CT: 46 (33%)                    | CC: 5 (3%)                      |
| Large vessel  | C: 69 (22%)                       | T: 245 (78%)                      | TT: 94 (60%)                    | CT: 57 (36%)                    | CC: 6 (3%)                      |
| Controls      | C: 297 (21%)                      | T: 1119 (79%)                     | TT: 443 (63%)                   | CT: 233 (33%)                   | CC: 32 (3%)                     |
| rs11206510    |                                   |                                   |                                 |                                 |                                 |
| Cases         | C: 270 (19%)                      | T: 1152 (81%)                     | TT: 463 (65%)                   | CT: 226 (32%)                   | CC: 22 (3%)                     |
| Cardioembolic | C: 57 (18%)                       | T: 257 (82%)                      | TT: 107 (68%)                   | CT: 43 (27%)                    | CC: 7 (3%)                      |
| Small vessel  | C: 47 (17%)                       | T: 233 (83%)                      | TT: 95 (68%)                    | CT: 43 (31%)                    | CC: 2 (3%)                      |
| Large vessel  | C: 58 (18%)                       | T: 256 (82%)                      | TT: 103 (66%)                   | CT: 50 (32%)                    | CC: 4 (3%)                      |
| Controls      | C: 271 (19%)                      | T: 1143 (81%)                     | TT: 466 (66%)                   | CT: 211 (30%)                   | CC: 30 (3%)                     |
| rs6725887     |                                   |                                   |                                 |                                 |                                 |
| Cases         | C: 161 (11%)                      | T: 1261 (89%)                     | TT: 558 (78%)                   | CT: 145 (20%)                   | CC: 8 (3%)                      |
| Cardioembolic | C: 33 (11%)                       | T: 279 (89%)                      | TT: 125 (80%)                   | CT: 29 (19%)                    | CC: 2 (3%)                      |
| Small vessel  | C: 31 (11%)                       | T: 251 (89%)                      | TT: 111 (79%)                   | CT: 29 (21%)                    | CC: 1 (3%)                      |
| Large vessel  | C: 32 (10%)                       | T: 282 (90%)                      | TT: 126 (80%)                   | CT: 30 (19%)                    | CC: 1 (3%)                      |
| Controls      | C: 186 (13%)                      | T: 1226 (87%)                     | TT: 532 (75%)                   | CT: 162 (23%)                   | CC: 12 (3%)                     |
| rs9818870     |                                   |                                   |                                 |                                 |                                 |
| Cases         | T: 214 (15%)                      | C: 1210 (85%)                     | CC: 516 (72%)                   | TC: 178 (25%)                   | TT: 18 (3%)                     |
| Cardioembolic | T: 56 (18%)                       | C: 258 (82%)                      | CC: 107 (68%)                   | TC: 44 (28%)                    | TT: 6 (3%)                      |
| Small vessel  | T: 44 (16%)                       | C: 238 (84%)                      | CC: 102 (72%)                   | TC: 34 (24%)                    | TT: 5 (3%)                      |
| Large vessel  | T: 41 (13%)                       | C: 273 (87%)                      | CC: 118 (75%)                   | TC: 37 (24%)                    | TT: 2 (3%)                      |
| Controls      | T: 246 (17%)                      | C: 1168 (83%)                     | CC: 482 (68%)                   | TC: 204 (29%)                   | TT: 21 (3%)                     |
| rs12526453    |                                   |                                   |                                 |                                 |                                 |
| Cases         | G: 488 (34%)                      | C: 936 (66%)                      | CC: 303 (43%)                   | GC: 330 (46%)                   | GG: 79 (3%)                     |
| Cardioembolic | G: 92 (29%)                       | C: 222 (71%)                      | CC: 74 (47%)                    | GC: 74 (47%)                    | GG: 9 (3%)                      |
| Small vessel  | G: 100 (35%)                      | C: 182 (65%)                      | CC: 62 (44%)                    | GC: 58 (41%)                    | GG: 21 (3%)                     |
| Large vessel  | G: 108 (34%)                      | C: 206 (66%)                      | CC: 65 (41%)                    | GC: 76 (48%)                    | GG: 16 (3%)                     |
| Controls      | G: 474 (34%)                      | C: 934 (66%)                      | CC: 302 (43%)                   | GC: 330 (47%)                   | GG: 72 (3%)                     |

**Online-only Table 6b: Allele and genotype frequencies in the combined Caucasian series**

| SNP           | Minor allele count and proportion | Major allele count and proportion | Genotype 1 count and proportion | Genotype 2 count and proportion | Genotype 3 count and proportion |
|---------------|-----------------------------------|-----------------------------------|---------------------------------|---------------------------------|---------------------------------|
| rs6922269     |                                   |                                   |                                 |                                 |                                 |
| Cases         | A: 416 (29%)                      | G: 1008 (71%)                     | GG: 357 (50%)                   | AG: 294 (41%)                   | AA: 61 (3%)                     |
| Cardioembolic | A: 85 (27%)                       | G: 229 (73%)                      | GG: 87 (55%)                    | AG: 55 (35%)                    | AA: 15 (3%)                     |
| Small vessel  | A: 96 (34%)                       | G: 186 (66%)                      | GG: 60 (43%)                    | AG: 66 (47%)                    | AA: 15 (3%)                     |
| Large vessel  | A: 84 (27%)                       | G: 230 (73%)                      | GG: 83 (53%)                    | AG: 64 (41%)                    | AA: 10 (3%)                     |
| Controls      | A: 406 (29%)                      | G: 1006 (71%)                     | GG: 352 (50%)                   | AG: 302 (43%)                   | AA: 52 (3%)                     |
| rs2048327     |                                   |                                   |                                 |                                 |                                 |
| Cases         | C: 508 (36%)                      | T: 914 (64%)                      | TT: 284 (40%)                   | CT: 346 (49%)                   | CC: 81 (3%)                     |
| Cardioembolic | C: 118 (38%)                      | T: 194 (62%)                      | TT: 59 (38%)                    | CT: 76 (49%)                    | CC: 21 (3%)                     |
| Small vessel  | C: 97 (34%)                       | T: 185 (66%)                      | TT: 62 (44%)                    | CT: 61 (43%)                    | CC: 18 (3%)                     |
| Large vessel  | C: 111 (35%)                      | T: 203 (65%)                      | TT: 65 (41%)                    | CT: 73 (46%)                    | CC: 19 (3%)                     |
| Controls      | C: 484 (34%)                      | T: 926 (66%)                      | TT: 304 (43%)                   | CT: 318 (45%)                   | CC: 83 (3%)                     |
| rs3127599     |                                   |                                   |                                 |                                 |                                 |
| Cases         | T: 433 (31%)                      | C: 981 (69%)                      | CC: 342 (48%)                   | TC: 297 (42%)                   | TT: 68 (3%)                     |
| Cardioembolic | T: 97 (31%)                       | C: 215 (69%)                      | CC: 75 (48%)                    | TC: 65 (42%)                    | TT: 16 (3%)                     |
| Small vessel  | T: 77 (28%)                       | C: 201 (72%)                      | CC: 74 (53%)                    | TC: 53 (38%)                    | TT: 12 (3%)                     |
| Large vessel  | T: 102 (33%)                      | C: 210 (67%)                      | CC: 69 (44%)                    | TC: 72 (46%)                    | TT: 15 (3%)                     |
| Controls      | T: 400 (28%)                      | C: 1014 (72%)                     | CC: 365 (52%)                   | TC: 284 (40%)                   | TT: 58 (3%)                     |
| rs7767084     |                                   |                                   |                                 |                                 |                                 |
| Cases         | C: 222 (16%)                      | T: 1202 (84%)                     | TT: 502 (71%)                   | CT: 198 (28%)                   | CC: 12 (3%)                     |
| Cardioembolic | C: 52 (17%)                       | T: 262 (83%)                      | TT: 110 (70%)                   | CT: 42 (27%)                    | CC: 5 (3%)                      |
| Small vessel  | C: 49 (17%)                       | T: 233 (83%)                      | TT: 94 (67%)                    | CT: 45 (32%)                    | CC: 2 (3%)                      |
| Large vessel  | C: 42 (13%)                       | T: 272 (87%)                      | TT: 115 (73%)                   | CT: 42 (27%)                    | CC: 0 (3%)                      |
| Controls      | C: 237 (17%)                      | T: 1179 (83%)                     | TT: 491 (69%)                   | CT: 197 (28%)                   | CC: 20 (3%)                     |
| rs10755578    |                                   |                                   |                                 |                                 |                                 |
| Cases         | G: 667 (47%)                      | C: 755 (53%)                      | CC: 192 (27%)                   | GC: 371 (52%)                   | GG: 148 (3%)                    |
| Cardioembolic | G: 146 (47%)                      | C: 166 (53%)                      | CC: 42 (27%)                    | GC: 82 (53%)                    | GG: 32 (3%)                     |
| Small vessel  | G: 133 (47%)                      | C: 149 (53%)                      | CC: 37 (26%)                    | GC: 75 (53%)                    | GG: 29 (3%)                     |
| Large vessel  | G: 149 (47%)                      | C: 165 (53%)                      | CC: 39 (25%)                    | GC: 87 (55%)                    | GG: 31 (3%)                     |
| Controls      | G: 653 (46%)                      | C: 763 (54%)                      | CC: 205 (29%)                   | GC: 353 (50%)                   | GG: 150 (3%)                    |

**Online-only Table 6c: Allele and genotype frequencies in the combined Caucasian series**

| SNP           | Minor allele count and proportion | Major allele count and proportion | Genotype 1 count and proportion | Genotype 2 count and proportion | Genotype 3 count and proportion |
|---------------|-----------------------------------|-----------------------------------|---------------------------------|---------------------------------|---------------------------------|
| rs1333040     |                                   |                                   |                                 |                                 |                                 |
| Cases         | C: 577 (40%)                      | T: 849 (60%)                      | TT: 251 (35%)                   | CT: 347 (49%)                   | CC: 115 (3%)                    |
| Cardioembolic | C: 148 (47%)                      | T: 166 (53%)                      | TT: 44 (28%)                    | CT: 78 (50%)                    | CC: 35 (3%)                     |
| Small vessel  | C: 127 (45%)                      | T: 155 (55%)                      | TT: 40 (28%)                    | CT: 75 (53%)                    | CC: 26 (3%)                     |
| Large vessel  | C: 109 (35%)                      | T: 205 (65%)                      | TT: 65 (41%)                    | CT: 75 (48%)                    | CC: 17 (3%)                     |
| Controls      | C: 539 (38%)                      | T: 873 (62%)                      | TT: 276 (39%)                   | CT: 321 (45%)                   | CC: 109 (3%)                    |
| rs4977574     |                                   |                                   |                                 |                                 |                                 |
| Cases         | G: 694 (49%)                      | A: 730 (51%)                      | AA: 189 (27%)                   | GA: 352 (49%)                   | GG: 171 (3%)                    |
| Cardioembolic | G: 132 (42%)                      | A: 182 (58%)                      | AA: 54 (34%)                    | GA: 74 (47%)                    | GG: 29 (3%)                     |
| Small vessel  | G: 124 (44%)                      | A: 158 (56%)                      | AA: 42 (30%)                    | GA: 74 (52%)                    | GG: 25 (3%)                     |
| Large vessel  | G: 166 (53%)                      | A: 148 (47%)                      | AA: 36 (23%)                    | GA: 76 (48%)                    | GG: 45 (3%)                     |
| Controls      | G: 708 (50%)                      | A: 704 (50%)                      | AA: 182 (26%)                   | GA: 340 (48%)                   | GG: 184 (3%)                    |
| rs1333042     |                                   |                                   |                                 |                                 |                                 |
| Cases         | A: 704 (49%)                      | G: 720 (51%)                      | GG: 184 (26%)                   | AG: 352 (49%)                   | AA: 176 (3%)                    |
| Cardioembolic | A: 175 (56%)                      | G: 139 (44%)                      | GG: 31 (20%)                    | AG: 77 (49%)                    | AA: 49 (3%)                     |
| Small vessel  | A: 151 (54%)                      | G: 131 (46%)                      | GG: 30 (21%)                    | AG: 71 (50%)                    | AA: 40 (3%)                     |
| Large vessel  | A: 146 (46%)                      | G: 168 (54%)                      | GG: 45 (29%)                    | AG: 78 (50%)                    | AA: 34 (3%)                     |
| Controls      | A: 677 (48%)                      | G: 737 (52%)                      | GG: 199 (28%)                   | AG: 339 (48%)                   | AA: 169 (3%)                    |
| rs2383207     |                                   |                                   |                                 |                                 |                                 |
| Cases         | A: 689 (48%)                      | G: 737 (52%)                      | GG: 193 (27%)                   | AG: 351 (49%)                   | AA: 169 (3%)                    |
| Cardioembolic | A: 171 (54%)                      | G: 143 (46%)                      | GG: 32 (20%)                    | AG: 79 (50%)                    | AA: 46 (3%)                     |
| Small vessel  | A: 148 (52%)                      | G: 134 (48%)                      | GG: 33 (23%)                    | AG: 68 (48%)                    | AA: 40 (3%)                     |
| Large vessel  | A: 142 (45%)                      | G: 172 (55%)                      | GG: 47 (30%)                    | AG: 78 (50%)                    | AA: 32 (3%)                     |
| Controls      | A: 666 (47%)                      | G: 748 (53%)                      | GG: 206 (29%)                   | AG: 336 (48%)                   | AA: 165 (3%)                    |
| rs1746048     |                                   |                                   |                                 |                                 |                                 |
| Cases         | T: 187 (13%)                      | C: 1237 (87%)                     | CC: 537 (75%)                   | TC: 163 (23%)                   | TT: 12 (3%)                     |
| Cardioembolic | T: 41 (13%)                       | C: 273 (87%)                      | CC: 120 (76%)                   | TC: 33 (21%)                    | TT: 4 (3%)                      |
| Small vessel  | T: 41 (15%)                       | C: 241 (85%)                      | CC: 104 (74%)                   | TC: 33 (23%)                    | TT: 4 (3%)                      |
| Large vessel  | T: 32 (10%)                       | C: 282 (90%)                      | CC: 125 (80%)                   | TC: 32 (20%)                    | TT: 0 (3%)                      |
| Controls      | T: 191 (13%)                      | C: 1225 (87%)                     | CC: 526 (74%)                   | TC: 173 (24%)                   | TT: 9 (3%)                      |

**Online-only Table 6d: Allele and genotype frequencies in the combined Caucasian series**

| SNP           | Minor allele count and proportion | Major allele count and proportion | Genotype 1 count and proportion | Genotype 2 count and proportion | Genotype 3 count and proportion |
|---------------|-----------------------------------|-----------------------------------|---------------------------------|---------------------------------|---------------------------------|
| rs2259816     |                                   |                                   |                                 |                                 |                                 |
| Cases         | T: 497 (35%)                      | G: 927 (65%)                      | GG: 301 (42%)                   | TG: 325 (46%)                   | TT: 86 (3%)                     |
| Cardioembolic | T: 116 (37%)                      | G: 198 (63%)                      | GG: 59 (38%)                    | TG: 80 (51%)                    | TT: 18 (3%)                     |
| Small vessel  | T: 102 (36%)                      | G: 180 (64%)                      | GG: 58 (41%)                    | TG: 64 (45%)                    | TT: 19 (3%)                     |
| Large vessel  | T: 108 (34%)                      | G: 206 (66%)                      | GG: 69 (44%)                    | TG: 68 (43%)                    | TT: 20 (3%)                     |
| Controls      | T: 491 (35%)                      | G: 917 (65%)                      | GG: 300 (43%)                   | TG: 317 (45%)                   | TT: 87 (3%)                     |
| rs1048990     |                                   |                                   |                                 |                                 |                                 |
| Cases         | G: 208 (15%)                      | C: 1214 (85%)                     | CC: 508 (71%)                   | GC: 198 (28%)                   | GG: 5 (3%)                      |
| Cardioembolic | G: 50 (16%)                       | C: 264 (84%)                      | CC: 109 (69%)                   | GC: 46 (29%)                    | GG: 2 (3%)                      |
| Small vessel  | G: 43 (15%)                       | C: 239 (85%)                      | CC: 99 (70%)                    | GC: 41 (29%)                    | GG: 1 (3%)                      |
| Large vessel  | G: 39 (12%)                       | C: 275 (88%)                      | CC: 118 (75%)                   | GC: 39 (25%)                    | GG: 0 (3%)                      |
| Controls      | G: 249 (18%)                      | C: 1153 (82%)                     | CC: 468 (67%)                   | GC: 217 (31%)                   | GG: 16 (3%)                     |
| rs17228212    |                                   |                                   |                                 |                                 |                                 |
| Cases         | C: 421 (30%)                      | T: 1003 (70%)                     | TT: 353 (50%)                   | CT: 297 (42%)                   | CC: 62 (3%)                     |
| Cardioembolic | C: 103 (33%)                      | T: 211 (67%)                      | TT: 71 (45%)                    | CT: 69 (44%)                    | CC: 17 (3%)                     |
| Small vessel  | C: 92 (33%)                       | T: 190 (67%)                      | TT: 65 (46%)                    | CT: 60 (43%)                    | CC: 16 (3%)                     |
| Large vessel  | C: 90 (29%)                       | T: 224 (71%)                      | TT: 81 (52%)                    | CT: 62 (39%)                    | CC: 14 (3%)                     |
| Controls      | C: 414 (29%)                      | T: 998 (71%)                      | TT: 351 (50%)                   | CT: 296 (42%)                   | CC: 59 (3%)                     |
| rs1122608     |                                   |                                   |                                 |                                 |                                 |
| Cases         | T: 383 (27%)                      | G: 1041 (73%)                     | GG: 388 (54%)                   | TG: 265 (37%)                   | TT: 59 (3%)                     |
| Cardioembolic | T: 82 (26%)                       | G: 232 (74%)                      | GG: 85 (54%)                    | TG: 62 (39%)                    | TT: 10 (3%)                     |
| Small vessel  | T: 75 (27%)                       | G: 207 (73%)                      | GG: 78 (55%)                    | TG: 51 (36%)                    | TT: 12 (3%)                     |
| Large vessel  | T: 85 (27%)                       | G: 229 (73%)                      | GG: 83 (53%)                    | TG: 63 (40%)                    | TT: 11 (3%)                     |
| Controls      | T: 352 (25%)                      | G: 1060 (75%)                     | GG: 403 (57%)                   | TG: 254 (36%)                   | TT: 49 (3%)                     |
| rs9982601     |                                   |                                   |                                 |                                 |                                 |
| Cases         | T: 156 (11%)                      | C: 1268 (89%)                     | CC: 569 (80%)                   | TC: 130 (18%)                   | TT: 13 (3%)                     |
| Cardioembolic | T: 35 (11%)                       | C: 279 (89%)                      | CC: 124 (79%)                   | TC: 31 (20%)                    | TT: 2 (3%)                      |
| Small vessel  | T: 37 (13%)                       | C: 245 (87%)                      | CC: 107 (76%)                   | TC: 31 (22%)                    | TT: 3 (3%)                      |
| Large vessel  | T: 38 (12%)                       | C: 276 (88%)                      | CC: 125 (80%)                   | TC: 26 (17%)                    | TT: 6 (3%)                      |
| Controls      | T: 165 (12%)                      | C: 1251 (88%)                     | CC: 550 (78%)                   | TC: 151 (21%)                   | TT: 7 (3%)                      |

**Online-only Table 7a: Allele and genotype frequencies in the ISGS African American series**

| SNP           | Minor allele count and proportion | Major allele count and proportion | Genotype 1 count and proportion | Genotype 2 count and proportion | Genotype 3 count and proportion |
|---------------|-----------------------------------|-----------------------------------|---------------------------------|---------------------------------|---------------------------------|
| rs646776      |                                   |                                   |                                 |                                 |                                 |
| Cases         | C: 111 (33%)                      | T: 221 (67%)                      | TT: 78 (47%)                    | CT: 65 (39%)                    | CC: 23 (3%)                     |
| Cardioembolic | C: 18 (31%)                       | T: 40 (69%)                       | TT: 14 (48%)                    | CT: 12 (41%)                    | CC: 3 (3%)                      |
| Small vessel  | C: 29 (32%)                       | T: 63 (68%)                       | TT: 24 (52%)                    | CT: 15 (33%)                    | CC: 7 (3%)                      |
| Large vessel  | C: 20 (36%)                       | T: 36 (64%)                       | TT: 14 (50%)                    | CT: 8 (29%)                     | CC: 6 (3%)                      |
| Controls      | C: 94 (40%)                       | T: 140 (60%)                      | TT: 44 (38%)                    | CT: 52 (44%)                    | CC: 21 (3%)                     |
| rs11206510    |                                   |                                   |                                 |                                 |                                 |
| Cases         | C: 36 (11%)                       | T: 296 (89%)                      | TT: 131 (79%)                   | CT: 34 (20%)                    | CC: 1 (3%)                      |
| Cardioembolic | C: 6 (10%)                        | T: 52 (90%)                       | TT: 23 (79%)                    | CT: 6 (21%)                     | CC: 0 (3%)                      |
| Small vessel  | C: 10 (11%)                       | T: 82 (89%)                       | TT: 36 (78%)                    | CT: 10 (22%)                    | CC: 0 (3%)                      |
| Large vessel  | C: 3 (5%)                         | T: 53 (95%)                       | TT: 25 (89%)                    | CT: 3 (11%)                     | CC: 0 (3%)                      |
| Controls      | C: 33 (14%)                       | T: 201 (86%)                      | TT: 88 (75%)                    | CT: 25 (21%)                    | CC: 4 (3%)                      |
| rs6725887     |                                   |                                   |                                 |                                 |                                 |
| Cases         | C: 8 (2%)                         | T: 324 (98%)                      | TT: 158 (95%)                   | CT: 8 (5%)                      | CC: 0 (3%)                      |
| Cardioembolic | C: 2 (3%)                         | T: 56 (97%)                       | TT: 27 (93%)                    | CT: 2 (7%)                      | CC: 0 (3%)                      |
| Small vessel  | C: 2 (2%)                         | T: 90 (98%)                       | TT: 44 (96%)                    | CT: 2 (4%)                      | CC: 0 (3%)                      |
| Large vessel  | C: 2 (4%)                         | T: 54 (96%)                       | TT: 26 (93%)                    | CT: 2 (7%)                      | CC: 0 (3%)                      |
| Controls      | C: 6 (3%)                         | T: 228 (97%)                      | TT: 112 (96%)                   | CT: 4 (3%)                      | CC: 1 (3%)                      |
| rs9818870     |                                   |                                   |                                 |                                 |                                 |
| Cases         | T: 34 (10%)                       | C: 298 (90%)                      | CC: 133 (80%)                   | TC: 32 (19%)                    | TT: 1 (3%)                      |
| Cardioembolic | T: 8 (14%)                        | C: 50 (86%)                       | CC: 22 (76%)                    | TC: 6 (21%)                     | TT: 1 (3%)                      |
| Small vessel  | T: 10 (11%)                       | C: 82 (89%)                       | CC: 36 (78%)                    | TC: 10 (22%)                    | TT: 0 (3%)                      |
| Large vessel  | T: 4 (7%)                         | C: 52 (93%)                       | CC: 24 (86%)                    | TC: 4 (14%)                     | TT: 0 (3%)                      |
| Controls      | T: 23 (10%)                       | C: 211 (90%)                      | CC: 95 (81%)                    | TC: 21 (18%)                    | TT: 1 (3%)                      |
| rs12526453    |                                   |                                   |                                 |                                 |                                 |
| Cases         | G: 56 (17%)                       | C: 276 (83%)                      | CC: 113 (68%)                   | GC: 50 (30%)                    | GG: 3 (3%)                      |
| Cardioembolic | G: 8 (14%)                        | C: 50 (86%)                       | CC: 21 (72%)                    | GC: 8 (28%)                     | GG: 0 (3%)                      |
| Small vessel  | G: 11 (12%)                       | C: 81 (88%)                       | CC: 36 (78%)                    | GC: 9 (20%)                     | GG: 1 (3%)                      |
| Large vessel  | G: 9 (16%)                        | C: 47 (84%)                       | CC: 19 (68%)                    | GC: 9 (32%)                     | GG: 0 (3%)                      |
| Controls      | G: 34 (15%)                       | C: 200 (85%)                      | CC: 84 (72%)                    | GC: 32 (27%)                    | GG: 1 (3%)                      |



**Online-only Table 7b: Allele and genotype frequencies in the ISGS African American series**

| SNP           | Minor allele count and proportion | Major allele count and proportion | Genotype 1 count and proportion | Genotype 2 count and proportion | Genotype 3 count and proportion |
|---------------|-----------------------------------|-----------------------------------|---------------------------------|---------------------------------|---------------------------------|
| rs6922269     |                                   |                                   |                                 |                                 |                                 |
| Cases         | A: 179 (54%)                      | G: 153 (46%)                      | GG: 36 (22%)                    | AG: 81 (49%)                    | AA: 49 (3%)                     |
| Cardioembolic | A: 28 (48%)                       | G: 30 (52%)                       | GG: 8 (28%)                     | AG: 14 (48%)                    | AA: 7 (3%)                      |
| Small vessel  | A: 55 (60%)                       | G: 37 (40%)                       | GG: 8 (17%)                     | AG: 21 (46%)                    | AA: 17 (3%)                     |
| Large vessel  | A: 24 (43%)                       | G: 32 (57%)                       | GG: 9 (32%)                     | AG: 14 (50%)                    | AA: 5 (3%)                      |
| Controls      | A: 123 (53%)                      | G: 111 (47%)                      | GG: 24 (21%)                    | AG: 63 (54%)                    | AA: 30 (3%)                     |
| rs2048327     |                                   |                                   |                                 |                                 |                                 |
| Cases         | C: 26 (8%)                        | T: 306 (92%)                      | TT: 141 (85%)                   | CT: 24 (14%)                    | CC: 1 (3%)                      |
| Cardioembolic | C: 6 (10%)                        | T: 52 (90%)                       | TT: 23 (79%)                    | CT: 6 (21%)                     | CC: 0 (3%)                      |
| Small vessel  | C: 5 (5%)                         | T: 87 (95%)                       | TT: 41 (89%)                    | CT: 5 (11%)                     | CC: 0 (3%)                      |
| Large vessel  | C: 5 (9%)                         | T: 51 (91%)                       | TT: 24 (86%)                    | CT: 3 (11%)                     | CC: 1 (3%)                      |
| Controls      | C: 19 (8%)                        | T: 215 (92%)                      | TT: 100 (85%)                   | CT: 15 (13%)                    | CC: 2 (3%)                      |
| rs3127599     |                                   |                                   |                                 |                                 |                                 |
| Cases         | T: 95 (29%)                       | C: 233 (71%)                      | CC: 81 (49%)                    | TC: 71 (43%)                    | TT: 12 (3%)                     |
| Cardioembolic | T: 18 (31%)                       | C: 40 (69%)                       | CC: 13 (45%)                    | TC: 14 (48%)                    | TT: 2 (3%)                      |
| Small vessel  | T: 27 (30%)                       | C: 63 (70%)                       | CC: 21 (47%)                    | TC: 21 (47%)                    | TT: 3 (3%)                      |
| Large vessel  | T: 24 (44%)                       | C: 30 (56%)                       | CC: 7 (26%)                     | TC: 16 (59%)                    | TT: 4 (3%)                      |
| Controls      | T: 64 (27%)                       | C: 170 (73%)                      | CC: 63 (54%)                    | TC: 44 (38%)                    | TT: 10 (3%)                     |
| rs7767084     |                                   |                                   |                                 |                                 |                                 |
| Cases         | C: 8 (2%)                         | T: 324 (98%)                      | TT: 158 (95%)                   | CT: 8 (5%)                      | CC: 0 (3%)                      |
| Cardioembolic | C: 2 (3%)                         | T: 56 (97%)                       | TT: 27 (93%)                    | CT: 2 (7%)                      | CC: 0 (3%)                      |
| Small vessel  | C: 0 (0%)                         | T: 92 (100%)                      | TT: 46 (100%)                   | CT: 0 (0%)                      | CC: 0 (3%)                      |
| Large vessel  | C: 1 (2%)                         | T: 55 (98%)                       | TT: 27 (96%)                    | CT: 1 (4%)                      | CC: 0 (3%)                      |
| Controls      | C: 7 (3%)                         | T: 227 (97%)                      | TT: 110 (94%)                   | CT: 7 (6%)                      | CC: 0 (3%)                      |
| rs10755578    |                                   |                                   |                                 |                                 |                                 |
| Cases         | G: 106 (32%)                      | C: 226 (68%)                      | CC: 75 (45%)                    | GC: 76 (46%)                    | GG: 15 (3%)                     |
| Cardioembolic | G: 21 (36%)                       | C: 37 (64%)                       | CC: 12 (41%)                    | GC: 13 (45%)                    | GG: 4 (3%)                      |
| Small vessel  | G: 29 (32%)                       | C: 63 (68%)                       | CC: 20 (43%)                    | GC: 23 (50%)                    | GG: 3 (3%)                      |
| Large vessel  | G: 24 (43%)                       | C: 32 (57%)                       | CC: 9 (32%)                     | GC: 14 (50%)                    | GG: 5 (3%)                      |
| Controls      | G: 81 (35%)                       | C: 153 (65%)                      | CC: 51 (44%)                    | GC: 51 (44%)                    | GG: 15 (3%)                     |

**Online-only Table 7c: Allele and genotype frequencies in the ISGS African American series**

| SNP           | Minor allele count and proportion | Major allele count and proportion | Genotype 1 count and proportion | Genotype 2 count and proportion | Genotype 3 count and proportion |
|---------------|-----------------------------------|-----------------------------------|---------------------------------|---------------------------------|---------------------------------|
| rs1333040     |                                   |                                   |                                 |                                 |                                 |
| Cases         | C: 112 (34%)                      | T: 220 (66%)                      | TT: 79 (48%)                    | CT: 62 (37%)                    | CC: 25 (3%)                     |
| Cardioembolic | C: 17 (29%)                       | T: 41 (71%)                       | TT: 14 (48%)                    | CT: 13 (45%)                    | CC: 2 (3%)                      |
| Small vessel  | C: 33 (36%)                       | T: 59 (64%)                       | TT: 20 (43%)                    | CT: 19 (41%)                    | CC: 7 (3%)                      |
| Large vessel  | C: 18 (32%)                       | T: 38 (68%)                       | TT: 15 (54%)                    | CT: 8 (29%)                     | CC: 5 (3%)                      |
| Controls      | C: 106 (45%)                      | T: 128 (55%)                      | TT: 38 (32%)                    | CT: 52 (44%)                    | CC: 27 (3%)                     |
| rs4977574     |                                   |                                   |                                 |                                 |                                 |
| Cases         | G: 73 (22%)                       | A: 259 (78%)                      | AA: 105 (63%)                   | GA: 49 (30%)                    | GG: 12 (3%)                     |
| Cardioembolic | G: 15 (26%)                       | A: 43 (74%)                       | AA: 15 (52%)                    | GA: 13 (45%)                    | GG: 1 (3%)                      |
| Small vessel  | G: 19 (21%)                       | A: 73 (79%)                       | AA: 29 (63%)                    | GA: 15 (33%)                    | GG: 2 (3%)                      |
| Large vessel  | G: 10 (18%)                       | A: 46 (82%)                       | AA: 20 (71%)                    | GA: 6 (21%)                     | GG: 2 (3%)                      |
| Controls      | G: 43 (18%)                       | A: 191 (82%)                      | AA: 78 (67%)                    | GA: 35 (30%)                    | GG: 4 (3%)                      |
| rs1333042     |                                   |                                   |                                 |                                 |                                 |
| Cases         | A: 21 (6%)                        | G: 311 (94%)                      | GG: 145 (87%)                   | AG: 21 (13%)                    | AA: 0 (3%)                      |
| Cardioembolic | A: 2 (3%)                         | G: 56 (97%)                       | GG: 27 (93%)                    | AG: 2 (7%)                      | AA: 0 (3%)                      |
| Small vessel  | A: 3 (3%)                         | G: 89 (97%)                       | GG: 43 (93%)                    | AG: 3 (7%)                      | AA: 0 (3%)                      |
| Large vessel  | A: 5 (9%)                         | G: 51 (91%)                       | GG: 23 (82%)                    | AG: 5 (18%)                     | AA: 0 (3%)                      |
| Controls      | A: 27 (12%)                       | G: 207 (88%)                      | GG: 93 (79%)                    | AG: 21 (18%)                    | AA: 3 (3%)                      |
| rs2383207     |                                   |                                   |                                 |                                 |                                 |
| Cases         | A: 21 (6%)                        | G: 311 (94%)                      | GG: 145 (87%)                   | AG: 21 (13%)                    | AA: 0 (3%)                      |
| Cardioembolic | A: 2 (3%)                         | G: 56 (97%)                       | GG: 27 (93%)                    | AG: 2 (7%)                      | AA: 0 (3%)                      |
| Small vessel  | A: 3 (3%)                         | G: 89 (97%)                       | GG: 43 (93%)                    | AG: 3 (7%)                      | AA: 0 (3%)                      |
| Large vessel  | A: 5 (9%)                         | G: 51 (91%)                       | GG: 23 (82%)                    | AG: 5 (18%)                     | AA: 0 (3%)                      |
| Controls      | A: 27 (12%)                       | G: 207 (88%)                      | GG: 93 (79%)                    | AG: 21 (18%)                    | AA: 3 (3%)                      |
| rs1746048     |                                   |                                   |                                 |                                 |                                 |
| Cases         | T: 155 (47%)                      | C: 177 (53%)                      | CC: 48 (29%)                    | TC: 81 (49%)                    | TT: 37 (3%)                     |
| Cardioembolic | T: 32 (55%)                       | C: 26 (45%)                       | CC: 5 (17%)                     | TC: 16 (55%)                    | TT: 8 (3%)                      |
| Small vessel  | T: 47 (51%)                       | C: 45 (49%)                       | CC: 10 (22%)                    | TC: 25 (54%)                    | TT: 11 (3%)                     |
| Large vessel  | T: 23 (41%)                       | C: 33 (59%)                       | CC: 11 (39%)                    | TC: 11 (39%)                    | TT: 6 (3%)                      |
| Controls      | T: 104 (44%)                      | C: 130 (56%)                      | CC: 39 (33%)                    | TC: 52 (44%)                    | TT: 26 (3%)                     |

**Online-only Table 7d: Allele and genotype frequencies in the ISGS African American series**

| SNP           | Minor allele count and proportion | Major allele count and proportion | Genotype 1 count and proportion | Genotype 2 count and proportion | Genotype 3 count and proportion |
|---------------|-----------------------------------|-----------------------------------|---------------------------------|---------------------------------|---------------------------------|
| rs2259816     |                                   |                                   |                                 |                                 |                                 |
| Cases         | T: 38 (11%)                       | G: 294 (89%)                      | GG: 130 (78%)                   | TG: 34 (20%)                    | TT: 2 (3%)                      |
| Cardioembolic | T: 7 (12%)                        | G: 51 (88%)                       | GG: 22 (76%)                    | TG: 7 (24%)                     | TT: 0 (3%)                      |
| Small vessel  | T: 5 (5%)                         | G: 87 (95%)                       | GG: 41 (89%)                    | TG: 5 (11%)                     | TT: 0 (3%)                      |
| Large vessel  | T: 5 (9%)                         | G: 51 (91%)                       | GG: 23 (82%)                    | TG: 5 (18%)                     | TT: 0 (3%)                      |
| Controls      | T: 36 (15%)                       | G: 198 (85%)                      | GG: 85 (73%)                    | TG: 28 (24%)                    | TT: 4 (3%)                      |
| rs1048990     |                                   |                                   |                                 |                                 |                                 |
| Cases         | G: 7 (2%)                         | C: 325 (98%)                      | CC: 159 (96%)                   | GC: 7 (4%)                      | GG: 0 (3%)                      |
| Cardioembolic | G: 0 (0%)                         | C: 58 (100%)                      | CC: 29 (100%)                   | GC: 0 (0%)                      | GG: 0 (3%)                      |
| Small vessel  | G: 2 (2%)                         | C: 90 (98%)                       | CC: 44 (96%)                    | GC: 2 (4%)                      | GG: 0 (3%)                      |
| Large vessel  | G: 2 (4%)                         | C: 54 (96%)                       | CC: 26 (93%)                    | GC: 2 (7%)                      | GG: 0 (3%)                      |
| Controls      | G: 13 (6%)                        | C: 221 (94%)                      | CC: 105 (90%)                   | GC: 11 (9%)                     | GG: 1 (3%)                      |
| rs17228212    |                                   |                                   |                                 |                                 |                                 |
| Cases         | C: 48 (14%)                       | T: 284 (86%)                      | TT: 121 (73%)                   | CT: 42 (25%)                    | CC: 3 (3%)                      |
| Cardioembolic | C: 9 (16%)                        | T: 49 (84%)                       | TT: 21 (72%)                    | CT: 7 (24%)                     | CC: 1 (3%)                      |
| Small vessel  | C: 10 (11%)                       | T: 82 (89%)                       | TT: 36 (78%)                    | CT: 10 (22%)                    | CC: 0 (3%)                      |
| Large vessel  | C: 9 (16%)                        | T: 47 (84%)                       | TT: 19 (68%)                    | CT: 9 (32%)                     | CC: 0 (3%)                      |
| Controls      | C: 29 (12%)                       | T: 205 (88%)                      | TT: 89 (76%)                    | CT: 27 (23%)                    | CC: 1 (3%)                      |
| rs1122608     |                                   |                                   |                                 |                                 |                                 |
| Cases         | T: 12 (4%)                        | G: 320 (96%)                      | GG: 154 (93%)                   | TG: 12 (7%)                     | TT: 0 (3%)                      |
| Cardioembolic | T: 3 (5%)                         | G: 55 (95%)                       | GG: 26 (90%)                    | TG: 3 (10%)                     | TT: 0 (3%)                      |
| Small vessel  | T: 2 (2%)                         | G: 90 (98%)                       | GG: 44 (96%)                    | TG: 2 (4%)                      | TT: 0 (3%)                      |
| Large vessel  | T: 3 (5%)                         | G: 53 (95%)                       | GG: 25 (89%)                    | TG: 3 (11%)                     | TT: 0 (3%)                      |
| Controls      | T: 11 (5%)                        | G: 223 (95%)                      | GG: 106 (91%)                   | TG: 11 (9%)                     | TT: 0 (3%)                      |
| rs9982601     |                                   |                                   |                                 |                                 |                                 |
| Cases         | T: 75 (23%)                       | C: 257 (77%)                      | CC: 100 (60%)                   | TC: 57 (34%)                    | TT: 9 (3%)                      |
| Cardioembolic | T: 16 (28%)                       | C: 42 (72%)                       | CC: 14 (48%)                    | TC: 14 (48%)                    | TT: 1 (3%)                      |
| Small vessel  | T: 15 (16%)                       | C: 77 (84%)                       | CC: 31 (67%)                    | TC: 15 (33%)                    | TT: 0 (3%)                      |
| Large vessel  | T: 8 (14%)                        | C: 48 (86%)                       | CC: 21 (75%)                    | TC: 6 (21%)                     | TT: 1 (3%)                      |
| Controls      | T: 71 (30%)                       | C: 163 (70%)                      | CC: 56 (48%)                    | TC: 51 (44%)                    | TT: 10 (3%)                     |

**Online-only Table 8a: Association of haplotypes of rs2048327-rs3127599-rs7767084-rs10755578 with cardioembolic stroke**

| Haplotype (rs2048327-rs3127599-rs7767084-rs10755578)   | Haplotype frequency           |          | P-value for association |
|--------------------------------------------------------|-------------------------------|----------|-------------------------|
|                                                        | Cardioembolic stroke patients | Controls |                         |
| Familial Caucasian series (34 patients, 374 controls)  |                               |          | 0.66                    |
| C-C-T-G                                                | 0.0%                          | 3.8%     |                         |
| T-T-T-G                                                | 7.8%                          | 11.7%    |                         |
| C-C-C-G                                                | 16.1%                         | 16.7%    |                         |
| C-T-T-G                                                | 15.8%                         | 13.5%    |                         |
| C-C-T-C                                                | 3.4%                          | 2.2%     |                         |
| T-C-T-C                                                | 54.0%                         | 49.7%    |                         |
| ISGS Caucasian series (123 patients, 334 controls)     |                               |          | 0.80                    |
| T-C-T-C                                                | 46.9%                         | 51.2%    |                         |
| T-T-T-G                                                | 10.8%                         | 13.4%    |                         |
| C-C-C-G                                                | 14.9%                         | 14.3%    |                         |
| C-C-T-C                                                | 1.0%                          | 1.6%     |                         |
| C-C-T-G                                                | 3.0%                          | 2.2%     |                         |
| T-T-T-C                                                | 2.4%                          | 2.0%     |                         |
| C-T-T-G                                                | 19.3%                         | 13.8%    |                         |
| Combined Caucasian series (157 patients, 708 controls) |                               |          | 0.56                    |
| T-T-T-G                                                | 10.1%                         | 12.5%    |                         |
| T-C-T-C                                                | 48.4%                         | 50.3%    |                         |
| C-C-T-G                                                | 2.3%                          | 3.0%     |                         |
| C-C-C-G                                                | 15.1%                         | 15.6%    |                         |
| C-C-T-C                                                | 1.5%                          | 2.0%     |                         |
| T-T-T-C                                                | 2.3%                          | 5.9%     |                         |
| C-T-T-G                                                | 18.5%                         | 13.7%    |                         |

- P-values result from score tests of association. Haplotypes with a frequency of less than 1% were not considered. Adjustments were made for age and gender (familial Caucasian series), age, gender, atrial fibrillation, coronary artery disease, diabetes, hypertension, and current smoking (ISGS Caucasian series), and age, gender, and series (combined Caucasian series).  
ISGS=Ischemic Stroke Genetics Study.

**Online-only Table 8b: Associations of haplotypes of rs2048327-rs3127599-rs7767084-rs10755578 with large vessel stroke**

| Haplotype (rs2048327-rs3127599-rs7767084-rs10755578)   | Haplotype frequency          |          | P-value for association |
|--------------------------------------------------------|------------------------------|----------|-------------------------|
|                                                        | Large vessel stroke patients | Controls |                         |
| Familial Caucasian series (67 patients, 374 controls)  |                              |          | 0.65                    |
| C-C-T-G                                                | 2.4%                         | 3.8%     |                         |
| C-C-C-G                                                | 13.4%                        | 16.7%    |                         |
| C-C-T-C                                                | 2.6%                         | 2.2%     |                         |
| T-C-T-C                                                | 51.1%                        | 49.7%    |                         |
| C-T-T-G                                                | 14.4%                        | 13.5%    |                         |
| T-T-T-G                                                | 15.3%                        | 11.7%    |                         |
| ISGS Caucasian series (90 patients, 334 controls)      |                              |          | 0.47                    |
| T-C-T-C                                                | 48.3%                        | 51.2%    |                         |
| C-C-T-C                                                | 1.3%                         | 1.6%     |                         |
| T-T-T-C                                                | 1.6%                         | 2.0%     |                         |
| C-C-C-G                                                | 13.2%                        | 14.3%    |                         |
| T-T-T-G                                                | 12.9%                        | 13.4%    |                         |
| C-C-T-G                                                | 2.8%                         | 2.2%     |                         |
| C-T-T-G                                                | 19.8%                        | 13.8%    |                         |
| Combined Caucasian series (157 patients, 708 controls) |                              |          | 0.24                    |
| C-C-C-G                                                | 13.4%                        | 15.6%    |                         |
| T-C-T-C                                                | 49.4%                        | 50.3%    |                         |
| T-T-T-C                                                | 1.3%                         | 1.5%     |                         |
| C-C-T-G                                                | 2.6%                         | 3.0%     |                         |
| C-C-T-C                                                | 1.8%                         | 2.0%     |                         |
| T-T-T-G                                                | 13.9%                        | 12.5%    |                         |
| C-T-T-G                                                | 17.5%                        | 13.7%    |                         |

- P-values result from score tests of association. Haplotypes with a frequency of less than 1% were not considered. Adjustments were made for age and gender (familial Caucasian series), age, gender, atrial fibrillation, coronary artery disease, diabetes, hypertension, and current smoking (ISGS Caucasian series), and age, gender, and series (combined Caucasian series).  
ISGS=Ischemic Stroke Genetics Study.

**Online-only Table 8c: Associations of haplotypes of rs2048327-rs3127599-rs7767084-rs10755578 with small vessel stroke**

| Haplotype (rs2048327-rs3127599-rs7767084-rs10755578)   | Haplotype frequency          |          | P-value for association |
|--------------------------------------------------------|------------------------------|----------|-------------------------|
|                                                        | Small vessel stroke patients | Controls |                         |
| Familial Caucasian series (81 patients, 374 controls)  |                              |          | 0.18                    |
| C-T-T-G                                                | 7.1%                         | 13.5%    |                         |
| C-C-T-C                                                | 1.4%                         | 2.2%     |                         |
| C-C-T-G                                                | 2.7%                         | 3.8%     |                         |
| C-C-C-G                                                | 18.5%                        | 16.7%    |                         |
| T-T-T-G                                                | 14.4%                        | 11.7%    |                         |
| T-C-T-C                                                | 55.4%                        | 49.7%    |                         |
| ISGS Caucasian series (60 patients, 334 controls)      |                              |          | 0.24                    |
| T-C-T-C                                                | 43.9%                        | 51.2%    |                         |
| C-C-T-C                                                | 1.9%                         | 1.6%     |                         |
| C-C-C-G                                                | 15.0%                        | 14.3%    |                         |
| T-T-T-C                                                | 1.8%                         | 2.0%     |                         |
| T-T-T-G                                                | 14.4%                        | 13.4%    |                         |
| C-T-T-G                                                | 19.7%                        | 13.8%    |                         |
| C-C-T-G                                                | 4.2%                         | 2.2%     |                         |
| Combined Caucasian series (141 patients, 708 controls) |                              |          | 0.74                    |
| T-T-T-C                                                | 0.7%                         | 1.5%     |                         |
| C-C-T-C                                                | 1.6%                         | 2.0%     |                         |
| C-T-T-G                                                | 12.5%                        | 13.7%    |                         |
| T-C-T-C                                                | 50.1%                        | 50.3%    |                         |
| C-C-T-G                                                | 3.3%                         | 3.0%     |                         |
| C-C-C-G                                                | 17.0%                        | 15.6%    |                         |
| T-T-T-G                                                | 14.4%                        | 12.5%    |                         |

- P-values result from score tests of association. Haplotypes with a frequency of less than 1% were not considered. Adjustments were made for age and gender (familial Caucasian series), age, gender, atrial fibrillation, coronary artery disease, diabetes, hypertension, and current smoking (ISGS Caucasian series), and age, gender, and series (combined Caucasian series).  
ISGS=Ischemic Stroke Genetics Study.
